# Supplementary material for: HbA1c variability in adults with type 1 diabetes on continuous subcutaneous insulin infusion (CSII) therapy compared to multiple daily injection (MDI) treatment
Source: PubMed Central journal article supplement — BMJ Open. 2019 Dec 29;9(12):e033059. doi: 10.1136/bmjopen-2019-033059 (PMC6937034; doi:10.1136/bmjopen-2019-033059), 2019-12-29
Supplement: bmjopen-2019-033059.draft_revisions.pdf [file bmjopen-2019-033059.draft_revisions.pdf]

# BMJ Open

BMJ Open is committed to open peer review. As part of this commitment we make the peer review history of every article we publish publicly available.

When an article is published we post the peer reviewers' comments and the authors' responses online. We also post the versions of the paper that were used during peer review. These are the versions that the peer review comments apply to.

The versions of the paper that follow are the versions that were submitted during the peer review process. They are not the versions of record or the final published versions. They should not be cited or distributed as the published version of this manuscript.

BMJ Open is an open access journal and the full, final, typeset and author-corrected version of record of the manuscript is available on our site with no access controls, subscription charges or pay-per-view fees (<http://bmjopen.bmj.com>).

If you have any questions on BMJ Open's open peer review process please email [info.bmjopen@bmj.com](mailto:info.bmjopen@bmj.com)

# BMJ Open

## HbA1c Variability in Adults With Type 1 Diabetes on Continuous Subcutaneous Insulin Infusion (CSII) Therapy Compared To Multiple Daily Injection (MDI) Treatment.

|                               |                                                                                                                                                                                                                                                                                                                                                                                                                                                                                                                                                                                                                                                                                                                                                                                                                                                                                                                                                                                                    |
|-------------------------------|----------------------------------------------------------------------------------------------------------------------------------------------------------------------------------------------------------------------------------------------------------------------------------------------------------------------------------------------------------------------------------------------------------------------------------------------------------------------------------------------------------------------------------------------------------------------------------------------------------------------------------------------------------------------------------------------------------------------------------------------------------------------------------------------------------------------------------------------------------------------------------------------------------------------------------------------------------------------------------------------------|
| Journal:                      | <i>BMJ Open</i>                                                                                                                                                                                                                                                                                                                                                                                                                                                                                                                                                                                                                                                                                                                                                                                                                                                                                                                                                                                    |
| Manuscript ID                 | bmjopen-2019-033059                                                                                                                                                                                                                                                                                                                                                                                                                                                                                                                                                                                                                                                                                                                                                                                                                                                                                                                                                                                |
| Article Type:                 | Research                                                                                                                                                                                                                                                                                                                                                                                                                                                                                                                                                                                                                                                                                                                                                                                                                                                                                                                                                                                           |
| Date Submitted by the Author: | 23-Jul-2019                                                                                                                                                                                                                                                                                                                                                                                                                                                                                                                                                                                                                                                                                                                                                                                                                                                                                                                                                                                        |
| Complete List of Authors:     | <p>Scott, Emma; NHMRC Clinical Trials Centre; Royal North Shore Hospital, Department of Diabetes, Endocrinology and Metabolism</p> <p>McGrath, Rachel; Royal North Shore Hospital, Department of Diabetes, Endocrinology and Metabolism ; University of Sydney, Northern Clinical School, Faculty of Medicine</p> <p>Januszewski, Andrzej; NHMRC Clinical Trials Centre; The University of Melbourne Medicine at St Vincent's Hospital</p> <p>Calandro, Daniel; NHMRC Clinical Trials Centre</p> <p>Hardikar, Anandwardhan; NHMRC Clinical Trials Centre</p> <p>O'Neal, David; University of Melbourne, Department of Medicine; St Vincent's Hospital Melbourne, Department of Endocrinology and Diabetes</p> <p>Fulcher, Gregory; Royal North Shore Hospital, Department of Diabetes, Endocrinology and Metabolism; University of Sydney, Northern Clinical School, Faculty of Medicine</p> <p>Jenkins, Alicia; University of Melbourne, Department of Medicine; NHMRC Clinical Trials Centre</p> |
| Keywords:                     | General diabetes < DIABETES & ENDOCRINOLOGY, Diabetes & endocrinology < INTERNAL MEDICINE, Paediatric endocrinology < DIABETES & ENDOCRINOLOGY                                                                                                                                                                                                                                                                                                                                                                                                                                                                                                                                                                                                                                                                                                                                                                                                                                                     |
|                               |                                                                                                                                                                                                                                                                                                                                                                                                                                                                                                                                                                                                                                                                                                                                                                                                                                                                                                                                                                                                    |

SCHOLARONE™  
Manuscripts

1  
2  
3 HbA1c Variability in Adults With Type 1 Diabetes on Continuous Subcutaneous  
4 Insulin Infusion (CSII) Therapy Compared To Multiple Daily Injection (MDI)  
5  
6 Treatment.  
7  
8  
9  
10  
11

12 Type 1 Diabetes Insulin Delivery Mode and Glycaemic Variability  
13  
14  
15  
16

17 E S Scott MBBS<sup>a,b</sup>

18 R T McGrath PhD<sup>b,c</sup>

19 A S Januszewski PhD<sup>a,d,e</sup>

20 D Calandro MD<sup>a</sup>

21 A A Hardikar, PhD<sup>a</sup>

22 D N O'Neal, MD <sup>a,d,e</sup>

23 G R Fulcher MD <sup>b,c</sup>

24 A J Jenkins, MD <sup>a,d,e</sup>

25  
26  
27  
28  
29  
30  
31  
32  
33  
34  
35  
36  
37 a. NHMRC Clinical Trials Centre, University of Sydney, Sydney, New South Wales,  
38 Australia  
39

40  
41  
42 b. Department of Diabetes, Endocrinology and Metabolism, Royal North Shore  
43 Hospital, Sydney, New South Wales, Australia  
44  
45

46  
47 c., The University of Sydney Northern Clinical School, Faculty of Medicine and  
48 Health, Sydney, New South Wales, Australia  
49

50  
51 d. Department of Endocrinology and Diabetes, St Vincent's Hospital, Melbourne,  
52 Victoria, Australia  
53

54  
55 e. University of Melbourne, Department of Medicine, St. Vincent's, Melbourne,  
56 Victoria, Australia  
57  
58  
59  
60

1  
2  
3  
4  
5 **Corresponding author:**  
6

7 Prof. Alicia Jenkins  
8

9  
10 Address. L6, 92-94 Parramatta Rd, Camperdown NSW 2050 Australia  
11

12 Phone. +61 2 9562 5000 Fax. +61 2 9565 1863  
13

14 Email: alicia.jenkins@ctc.usyd.edu.au  
15  
16  
17  
18

19 **Word Count:** Abstract 289. Article: 3310 (main text and acknowledgements).  
20  
21  
22  
23

24 Number of tables: 2 in article. Number of figures: 3 in article.  
25

26 Number of Supplementary tables: 3. Number of Supplementary figures: 1.  
27  
28  
29  
30  
31  
32  
33  
34  
35  
36  
37  
38  
39  
40  
41  
42  
43  
44  
45  
46  
47  
48  
49  
50  
51  
52  
53  
54  
55  
56  
57  
58  
59  
60

## ABSTRACT

**Objective:** To determine if continuous subcutaneous insulin infusion (CSII) therapy is associated with lower HbA1c variability (long-term glycaemic variability GV) relative to multiple daily injection (MDI) treatment in adults with Type 1 diabetes (T1DM).

**Design:** Retrospective audit

**Setting and participants:** Clinic records from 506 adults with T1DM from two tertiary Australian hospitals.

**Outcome measures:** Long-term GV was assessed by HbA1c standard deviation (SD) and coefficient of variation (CV) in adults on established MDI or CSII therapy, and in a subset changing from MDI to CSII.

**Results:** Adults (n = 506, (164 CSII), 50% women, mean  $\pm$  SD age  $38.0 \pm 15.3$  yrs,  $17.0 \pm 13.7$  yrs diabetes, mean HbA1c  $7.8 \pm 1.2\%$  [ $62 \pm 13$  mmol/mol] on CSII,  $8.0 \pm 1.5\%$  [ $64 \pm 16$  mmol/mol] on MDI) were followed for  $4.1 \pm 3.6$  yrs. CSII use was associated with lower GV (HbA1c SD: CSII vs. MDI  $0.5 \pm 0.41\%$  [ $6 \pm 6$  mmol/mol] vs.  $0.7 \pm 0.7\%$  [ $9 \pm 8$  mmol/mol] and CV: CSII vs. MDI  $6.7 \pm 4.6\%$  [ $10 \pm 10$  mmol/mol] vs.  $9.3 \pm 7.3\%$  [ $14 \pm 13$  mmol/mol], both  $P < 0.001$ . Fifty-six adults (73% female, age  $36 \pm 13$  yrs,  $16 \pm 13$  yrs diabetes, HbA1c  $7.8 \pm 0.8\%$  [ $62 \pm 9$  mmol/mol] transitioned from MDI to CSII. Mean HbA1c fell by 0.4%. GV from one-year post-CSII commencement decreased significantly, HbA1c SD pre vs. post-CSII  $0.7 \pm 0.5\%$  [ $8 \pm 5$  mmol/mol] vs.  $0.4 \pm 0.4\%$  [ $5 \pm 4$  mmol/mol];  $P < 0.001$ , and HbA1c CV  $9.2 \pm 5.5\%$  [ $13 \pm 8$  mmol/mol] vs.  $6.1 \pm 3.9\%$  [ $9 \pm 5$  mmol/mol];  $P < 0.001$ .

**Conclusions:** In clinical practice with T1DM adults relative to MDI, CSII therapy is associated with lower HbA1c GV. Relationships between HbA1c GV and chronic complications are of interest.

## Strengths and limitations of this study

- A relatively large real-world observational study across a wide age and socioeconomic status from two tertiary hospitals allows for generalisability of results
- HbA1c GV, a simple low-cost mathematical measure, assessed using two formulae, with similar results, and in venous blood in accredited laboratories
- Analysis in those on established MDI or CSII therapy and in a subset who changed modalities, and a control group of MDI users who remained on MDI.
- Not a randomised study therefore not able to completely adjust for possible behavioural differences
- Complements and extends a prior publication by the group in which short-term GV based on interstitial fluid Continuous Glucose Monitoring (CGM) measures did not differ by insulin delivery modality.

**Keywords:** Glycaemic variability, Type 1 diabetes, Continuous subcutaneous insulin infusion, Multiple daily injection.

## INTRODUCTION

Type 1 diabetes (T1DM) is characterised by day-to-day glucose fluctuations, much more so than in Type 2 diabetes (T2DM). The Diabetes Control and Complications Trial (DCCT) established that near normal glycaemic control, reflected by HbA1c levels, substantially reduces the risk of long-term vascular and neurologic complications,(1). Short-term GV can be assessed by analysing multiple daily capillary blood glucose levels, or by continuous (interstitial fluid) glucose monitoring

1  
2  
3 (CGM), and at cellular level has been demonstrated,(2, 3), to increase oxidative stress,  
4 inflammation and epigenetic changes,(4). Longer term GV can be assessed by  
5 analysing variation in HbA1c levels over time, usually reported as HbA1c standard  
6 deviation (SD) and /or coefficient of variation (CV), and has been implicated as an  
7 independent risk factor for the development of chronic complications in people with  
8 both T1DM and T2DM,(4-7). Short and long term GV do not always correlate.  
9  
10  
11  
12  
13  
14  
15  
16  
17  
18

19 In people with T1DM, insulin can be delivered by either multiple daily injections (MDI)  
20 or by continuous subcutaneous insulin infusion (CSII). There is emerging  
21 epidemiologic evidence that CSII use (independent of HbA1c levels) is associated with  
22 a reduction in chronic complications in both adult and paediatric age groups and with  
23 reduced cardiovascular mortality in adults with T1DM,(5, 8). Although CSII use is  
24 generally associated with lower HbA1c levels compared to MDI,(9), there are no  
25 consistent reported associations in the literature between short-term and long-term  
26 GV and insulin delivery mode. CSII without frequent real-time continuous glucose  
27 monitoring (RT-CGM) is usually associated with similar short-term GV as MDI,(10-12),  
28 including in our previous study in T1DM adults in the same setting as herein. With  
29 regard to long-term GV, there is only one published study, and that is in a paediatric  
30 setting, which demonstrated long-term GV benefit of CSII compared to MDI over a  
31 three year period,(13).  
32  
33  
34  
35  
36  
37  
38  
39  
40  
41  
42  
43  
44  
45  
46  
47  
48  
49  
50

51 The primary aim of the present study was to examine HbA1c GV in adults with T1DM  
52 treated by CSII and MDI therapies predominantly without RT-CGM use in the real-  
53 world setting, not in a clinical trial. Hence, we compared HbA1c SD and CV over years  
54 in adults with T1DM treated by CSII, to those of adults treated by MDI, and also in  
55  
56  
57  
58  
59  
60

1  
2  
3 those changing from MDI to CSII therapy. Results were analysed with and without  
4  
5 adjustment for mean HbA1c levels. As glycaemic benefit of technology may differ by  
6  
7 user age group,(14) we also compared results in emerging adults (aged 18-26 years)  
8  
9 and more mature adults ( $\geq 26$  years).  
10  
11  
12  
13

## 14 **MATERIALS AND METHODS**

### 15 **Subjects**

16  
17 We undertook a retrospective audit of clinical records of adults with T1DM attending  
18  
19 outpatient diabetes clinics at two independent tertiary referral hospitals (Royal North  
20  
21 Shore Hospital (RNSH), Sydney and St Vincent's Hospital (SVH), Melbourne,  
22  
23 Australia). Data from 1995-2018 were collected. Participants were excluded if they  
24  
25 were less than 18 years old, pregnant or breast-feeding, had less than two HbA1c  
26  
27 results on record, or had less than one year of CSII therapy. The insulin pumps  
28  
29 were not used with continuous real-time CGM (RT-CGM). Flash glucose monitoring  
30  
31 became available in Australia in late 2016 and was not subsidised, and RT-CGM  
32  
33 only became subsidised for those under 21 years of age in 2017, therefore these  
34  
35 modalities were rarely used in our public hospital settings during the study period.  
36  
37 The study was approved by the Human Research Ethics Committees of the Northern  
38  
39 Sydney Local Health District and St Vincent's Hospital Melbourne. As this was a  
40  
41 retrospective audit, it was not appropriate or possible to directly involve  
42  
43 patients or public in this work.  
44  
45  
46  
47  
48  
49  
50  
51  
52  
53

### 54 **Data collection.**

55  
56 All HbA1c results were obtained from laboratories accredited with the National  
57  
58 Association of Testing (NATA) and the Royal College of Pathologists of Australasia  
59  
60



1  
2  
3 (RCPA). All NATA accredited laboratories are required to participate in a  
4  
5 standardisation program and to standardise HbA1c measurements to the International  
6  
7 Federation of Clinical Chemistry and Laboratory Medicine (IFCC) guidelines. Patients  
8  
9 usually had their laboratory tests performed by the same pathology provider.  
10  
11 Demographic and clinical parameters (including insulin treatment modality, chronic  
12  
13 complication status, incidence of severe hypoglycaemia (defined as any episode of  
14  
15 hypoglycaemia requiring assistance from another person for recovery) were obtained  
16  
17 from the medical records. Socioeconomic status was estimated via the subject's home  
18  
19 address postcode (zip code) via the Australian Bureau of Statistics Socio-Economic  
20  
21 Indexes for Areas (SEIFA), 2011,(15).  
22  
23  
24  
25  
26  
27  
28

### 29 **Glycaemic variability**

30  
31 HbA1c GV was assessed through the mean within-individual SD and CV ((SD HbA1c  
32  
33 / mean HbA1c) x 100) of available HbA1c levels. If individuals had changed treatment  
34  
35 modality from MDI to CSII, the initial 12 months of HbA1c assessments post-CSII  
36  
37 initiation were excluded, (as HbA1c usually decreases significantly during this  
38  
39 time),(16, 17).  
40  
41  
42  
43  
44

### 45 **Statistical analyses**

46  
47 Data were stored in EXCEL (2010) and IBM SPSS Statistics (version 22) and Graph  
48  
49 Pad Prism (version 6.0) were used for data analyses, including descriptive statistics,  
50  
51 paired and independent T-tests, Chi-square tests and Pearson correlation coefficients.  
52  
53 Statistical significance was taken at  $P < 0.05$ . Results were analysed as a whole and  
54  
55 with subgroup analyses by age (18 - < 26 years and  $\geq 26$  years) and by gender.  
56  
57 Participants on established insulin therapies (MDI or CSII) were analysed, as were a  
58  
59  
60

1  
2  
3 group of individuals analysed pre- and post-insulin modality change (MDI to CSII).  
4  
5 The participants who changed from MDI to CSII were matched (by age, baseline  
6  
7 HbA1c and years of follow up) to a subgroup of adults who remained on MDI. GV was  
8  
9 compared pre- and after 1-year post-modality change in the MDI to CSII group, and  
10  
11 pre- and post a matched duration of follow-up in the group who remained on MDI.  
12  
13 Where applicable, results were analysed with adjustment by least squares method for  
14  
15 hospital location, gender, vascular complications, severe hypoglycaemia, age,  
16  
17 diabetes duration, mean HbA1c levels, number of included HbA1c measurements,  
18  
19 time between HbA1c measurements, years of follow-up, average decile of  
20  
21 socioeconomic advantage and disadvantage and decile of education and occupation.  
22  
23  
24  
25  
26  
27

## 28 **RESULTS**

### 29 **Subject demographics.**

30  
31 Baseline clinical characteristics of 506 adults with T1DM studied over time whilst on a  
32  
33 single insulin delivery modality are shown in Table 1, with participants from both  
34  
35 hospitals merged. The group is also described based on insulin delivery mode. SVH  
36  
37 participants (n = 112) were more likely to be treated by CSII compared to the RNSH  
38  
39 participants (66 (59 %) vs. 98 (25 %);  $P < 0.001$ ) as SVH was an earlier adopter of  
40  
41 CSII into their clinical practice. SVH subjects were more likely to be female, had fewer  
42  
43 vascular complications, lower socioeconomic status, longer years of HbA1c follow-up  
44  
45 and more available HbA1c measurements compared to the RNSH participants  
46  
47 (Supplementary Table 1). The (merged sites, Table 1) CSII users were younger, more  
48  
49 likely to be female (in keeping with a noted national trend,(18), and less likely to have  
50  
51 vascular complications or a previous documented episode of severe hypoglycaemia  
52  
53 and had a significantly lower socioeconomic status relative to the MDI group. There  
54  
55  
56  
57  
58  
59  
60

were no significant differences in the years of follow-up between the CSII and MDI groups, nor the number of HbA1c measurements included in the study. CSII users had a slightly shorter mean  $\pm$  SD time between HbA1c measurements compared to MDI users ( $213 \pm 173$  vs.  $249 \pm 203$ ) days respectively;  $P = 0.047$ ). There were no significant differences in mean (SD) HbA1c levels nor the number of measures evaluated over the study period between the CSII and MDI groups ( $7.8 \pm 1.2$  % [ $62 \pm 13$ ] mmol/mol ( $n = 8$  HbA1c measures) CSII and  $8.0 \pm 1.5$  % [ $64 \pm 16$ ] mmol/mol ( $n = 8$  HbA1c measures) MDI;  $P = 0.13$ ).

**Table 1 Clinical characteristics of adults with Type 1 diabetes.**

|                                 | CSII            | MDI             | P value           |
|---------------------------------|-----------------|-----------------|-------------------|
| N                               | 164             | 342             |                   |
| Age (years)                     | $34 \pm 13.4$   | $39 \pm 15.8$   | <b>&lt; 0.001</b> |
| Women (n (%))                   | 106 (65)        | 148 (43)        | <b>&lt; 0.001</b> |
| Years of diabetes               | $17 \pm 12.5$   | $18 \pm 14.3$   | 0.55              |
| Years CSII therapy              | $6.0 \pm 3.6$   | N/A             | -                 |
| Vascular complications (n (%))* | 49 (30)         | 143 (42)        | <b>0.008</b>      |
| Severe hypoglycaemia (n (%))†   | 14 (14)         | 70 (21)         | <b>0.045</b>      |
| Socioeconomic status (decile):  |                 |                 |                   |
| Advantage / Disadvantage        |                 |                 |                   |
| Education & occupation          | $8 \pm 2.3$     | $9 \pm 1.9$     | <b>0.005</b>      |
|                                 | $8 \pm 2.4$     | $9 \pm 1.9$     | <b>&lt; 0.001</b> |
| Years follow-up                 | $4.1 \pm 2.74$  | $4.1 \pm 3.97$  | 0.90              |
| HbA1c measures (n)              | $8 \pm 7.3$     | $8 \pm 8.2$     | 0.96              |
| Time between HbA1c (days)       | $213 \pm 173.1$ | $249 \pm 202.8$ | <b>0.047</b>      |
| Mean HbA1c                      |                 |                 |                   |
| %                               | $7.8 \pm 1.20$  | $8.0 \pm 1.5$   | 0.13              |
| [mmol/mol]                      | [ $62 \pm 13$ ] | [ $64 \pm 16$ ] |                   |

Data are mean  $\pm$  standard deviation, or n (percentage). \* Microvascular and/or macrovascular complications. † Any episode of severe hypoglycaemia recorded in the medical record.

### **Lower HbA1c GV in CSII users.**

CSII-users had significantly lower long-term variability in HbA1c as reflected by both HbA1c SD and CV measures (Fig. 1). The difference remains statistically significant after adjustment (least squares) for gender, hospital location, chronic complication status, severe hypoglycaemia, baseline HbA1c levels, years of follow-up, number of HbA1c measures, time between HbA1c tests, diabetes duration, socioeconomic status and age (both  $P = 0.003$ ). In order to account for possible differences in glycaemic control by hospital location, insulin modality treatments were compared separately at the two sites and similar significantly lower GV was observed in CSII (vs. MDI) users (Supplemental Figure 1). GV was also analysed by gender, and similarly lower HbA1c SD and CV was observed in CSII compared to MDI participants in both men and women. HbA1c SD in women ( $(0.6 \pm 0.5 \% [7 \pm 6] \text{ mmol/mol})$  CSII,  $(0.8 \pm 0.7 \% [9 \pm 8] \text{ mmol/mol})$  MDI,  $P = 0.005$ ) and in men ( $(0.4 \pm 0.3 \% [5 \pm 3] \text{ mmol/mol})$  CSII,  $(0.8 \pm 0.7 \% [9 \pm 8] \text{ mmol/mol})$  MDI,  $P = 0.002$ ). HbA1c CV in women ( $(7 \pm 5 \% [11 \pm 12] \text{ mmol/mol})$  CSII,  $(9 \pm 8 \% [14 \pm 12] \text{ mmol/mol})$  MDI,  $P = 0.02$ ) and in men ( $(6 \pm 3 \% [8 \pm 4] \text{ mmol/mol})$  CSII,  $(9 \pm 7 \% [15 \pm 13] \text{ mmol/mol})$  MDI,  $P = 0.002$ ).

### **Similar pattern of HbA1c variability in adults with T1DM by age group and insulin treatment modality.**

Analysis by pre-determined age-subgroups (18 - < 26 years and  $\geq 26$  years) demonstrated that mean HbA1c was lower in the older CSII vs. older MDI users:  $(7.6 \pm 1.1 \% [59 \pm 12] \text{ mmol/mol})$  CSII and  $7.9 \pm 1.4 \% [62 \pm 16] \text{ mmol/mol})$  MDI;  $P = 0.034$ ), although there was no statistically significant difference in the 18 - < 26 year old group: (CSII vs. MDI;  $8.3 \pm 1.3 \% [66 \pm 14] \text{ mmol/mol})$  vs.  $8.5 \pm 1.6 \% [68 \pm 18] \text{ mmol/mol})$  (Supplementary Table 2). Furthermore, there were significantly lower HbA1c SD and

CV over follow-up amongst both age groups treated with CSII versus those treated with MDI (Figure 2).

### **Lower HbA1c GV in adults changing from MDI to CSII.**

Fifty-six adults chose to change their insulin delivery modality from MDI to CSII. These individuals had a mean  $\pm$  SD age of  $36 \pm 14$  years ( $35 \pm 12$  for women and  $40 \pm 17$  for men), diabetes duration of  $16 \pm 13$  years and 73% were female. The observation period included  $4.3 \pm 3.5$  years on MDI and  $4.6 \pm 4.7$  years on CSII after excluding the initial 12 months on CSII ( $P = 0.56$ ), during which the mean HbA1c fell significantly. There was a similar, significantly greater number of HbA1c measurements used to determine GV whilst on CSII compared to MDI; mean  $\pm$  SD ( $n = 10 \pm 8$  and  $n = 9 \pm 7$  respectively;  $P = 0.002$ ), and a shorter duration between HbA1c measurements whilst on CSII compared to MDI ( $215 \pm 158$  and  $336 \pm 501$  days respectively;  $P < 0.001$ ). HbA1c levels significantly decreased following the switch to CSII, including after excluding the first 12 months of HbA1c following modality change, mean  $\pm$  SD ( $7.8 \pm 0.8$  % [ $62 \pm 9$ ] mmol/mol) MDI vs. ( $7.4 \pm 0.9$  % [ $57 \pm 10$ ] mmol/mol) CSII;  $P < 0.001$ ) (Fig. 3 a). In addition, CSII use lowered HbA1c variability, with CSII commencement decreasing both HbA1c SD ( $0.7 \pm 0.5$  % [ $8 \pm 5$ ] mmol/mol) MDI vs.  $0.4 \pm 0.4$  % [ $5 \pm 4$ ] mmol/mol) CSII;  $P < 0.001$ ) and HbA1c CV ( $9.2 \pm 5.5$  % [ $13 \pm 8$ ] mmol/mol) MDI vs. ( $6.1 \pm 3.9$  % [ $9 \pm 5$ ] mmol/mol) CSII;  $P = 0.004$ ) (Fig. 3 b, c). There were no statistically significant correlations between the improvement in HbA1c SD or CV with baseline variables such as age and diabetes duration (data not shown). The change in HbA1c, HbA1c SD and CV was analysed by gender and there were similar improvements in both men and women (Supplementary Table 3)

The 56 adults who changed from MDI to CSII were matched (by age, baseline HbA1c and duration of follow-up) to 56 adults who remained on MDI. There were no statistically significant differences in baseline HbA1c, age, years of follow-up nor time between HbA1c measurements between these groups (Table 2). Individuals who changed to CSII had more HbA1c values whilst on CSII ( $n = 10 \pm 8$  vs.  $8 \pm 6$ ;  $P = 0.048$ ). In contrast to the adults who changed from MDI to CSII, the adults who remained on MDI did not significantly improve mean, standard deviation or coefficient of variation HbA1c.

**Table 2. Glycaemic variability in individuals changing from MDI to CSII compared to matched individuals remaining on MDI**

|                           | MDI to CSII                |                            |                  | Remained on MDI             |                                 |           | P value ** |
|---------------------------|----------------------------|----------------------------|------------------|-----------------------------|---------------------------------|-----------|------------|
|                           | Pre                        | Post                       | P value *        | Pre                         | Post                            | P value * |            |
| N                         | 56                         |                            |                  | 56                          |                                 |           |            |
| Age (years)               | $36 \pm 13.5$              |                            |                  | $38 \pm 15.7$               |                                 |           | 0.58       |
| Baseline HbA1c %          | $7.9 \pm 1.4$<br>[63±15.7] |                            |                  | $7.9 \pm 1.5$<br>[63±16.3]  |                                 |           | 0.90       |
| Study follow-up (years)   | $10.0 \pm 5.9$             |                            |                  | $9.4 \pm 6.5$               |                                 |           | 0.61       |
| HbA1c measurements (n)    | $9 \pm 6.8$                | $10 \pm 7.8^A$             | <b>0.002</b>     | $8 \pm 7.5$                 | $8 \pm 6.4^A$                   | 1.00      |            |
| Time between HbA1c (days) | $336 \pm 501$<br>1         | $215 \pm 157$<br>8         | <b>&lt;0.001</b> | $281 \pm 205$<br>5          | $238 \pm 166$<br>2              | 0.18      |            |
| Mean HbA1c %              | $7.8 \pm 0.81$<br>[62±8.7] | $7.4 \pm 0.91$<br>[57±9.9] | <b>&lt;0.001</b> | $7.7 \pm 1.09$<br>[61±12.0] | $7.7 \pm 1.18$<br>61±12.9]      | 0.64      |            |
| HbA1c SD %                | $0.7 \pm 0.51$<br>[8±4.8]  | $0.4 \pm 0.40$<br>[5±3.7]  | <b>&lt;0.001</b> | $0.6 \pm 0.45$<br>[7±4.8]   | $0.50 \pm 0.3$<br>0)<br>[5±3.3] | 0.10      |            |
| HbA1c CV% %               | <b>0.004</b>               |                            |                  | $6.4 \pm 3.54$              | 0.12                            |           |            |

|            |          |          |          |         |
|------------|----------|----------|----------|---------|
| [mmol/mol] | 9.2±5.54 | 6.1±3.89 | 7.8±5.21 | [9±4.9] |
|            | [13±7.6] | [9±5.37] | [11±6.9] |         |

Data are mean ± standard deviation. \*Pre- vs. Post- values MDI to CSII and Remains on MDI group. \*\*Values MDI to CSII vs. Remains on CSII. <sup>A</sup> P<0.05 post-value MDI to CSII vs. Remains on CSII group.

## DISCUSSION

In this retrospective audit of 506 adults with T1DM from two independent Australian tertiary referral diabetes centres, we report the novel finding that CSII therapy was associated with lower long-term (HbA1c) glycaemic variability than MDI therapy, despite similar mean HbA1c levels across the two modalities. Participants treated by CSII (without regular RT-CGM, low glucose suspend, predictive low glucose suspend or closed loop functions and without regular flash glucose monitoring) had significantly lower HbA1c variability reflected by both SD and CV measures. GV amongst CSII users remained significantly lower after adjustment for age, gender, diabetes duration, hospital location, socioeconomic status, chronic complication status, severe hypoglycaemia, baseline HbA1c levels, years of follow up, number of HbA1c measures and time between HbA1c measures. The groups of emerging and more mature adults showed similar HbA1c GV responses, as did males and females. Similar statistically significant reductions in both measures of HbA1c GV were seen with 56 patients who changed from MDI to CSII therapy, whilst MDI users who remained on MDI for a similar follow-up time did not significantly change their HbA1c GV.

1  
2  
3 Glycaemic variability has been identified as an independent risk factor for the chronic  
4 complications of diabetes,(6, 7) and in a large Swedish diabetes registry based  
5 epidemiologic study CSII use was independently associated with a significantly lower  
6 risk of cardiovascular complications and death,(5). This finding may at least partly  
7 relate to GV, and fluctuations between hyper- and hypoglycaemia inducing  
8 inflammation and oxidative stress and epigenetic changes,(2, 4). We speculate that  
9 lower HbA1c variability, as associated with CSII use in our study, may underpin or at  
10 least contribute to the observed reduced chronic complication and death rates  
11 amongst CSII users,(5, 6, 8, 19). There may be divergent effects of insulin treatment  
12 modality on measures of short-term (blood or interstitial fluid glucose level based) and  
13 long-term (HbA1c) glucose variability. We have previously demonstrated in 119 adult  
14 individuals with T1D (77 MDI and 42 CSII users) no statistically significant difference  
15 in any of 12 accepted measures of short-term glucose variability over 48 hours when  
16 analysed by masked CGM,(20). Unfortunately, due to the costly nature of CGM in  
17 Australia at the time of the study, when it was predominantly self-funded, , only a very  
18 small subset of patients used episodic RT-CGM and usually less than the 70% of time  
19 described as needed to improve glycaemia(21). These negative results are  
20 comparable to other studies assessing short-term (CGM) glucose variability in CSII  
21 users,(8, 12, 22). Even in studies in which HbA1c levels were significantly improved  
22 by CSII or CSII with RT-CGM, short-term GV did not improve in all participants,(14,  
23 23). More recent studies, including those achieving tight glycaemic control,(24), or  
24 using RT-CGM and insulin pumps with low-glucose suspend functions,(25), overnight  
25 closed loop insulin delivery,(26) or hybrid closed loop CSII,(27) have demonstrated  
26 improved short-term glucose variability. These studies have not reported HbA1c GV  
27 change. We anticipate that technological advances in pumps, sensors and control  
28  
29  
30  
31  
32  
33  
34  
35  
36  
37  
38  
39  
40  
41  
42  
43  
44  
45  
46  
47  
48  
49  
50  
51  
52  
53  
54  
55  
56  
57  
58  
59  
60



1  
2  
3 algorithms will continue to reduce short-term GV, and also long-term GV, in both adults  
4 and children with T1DM. It is important to consider whether study participants are in  
5 clinical trials, with their inherent selection biases and often additional participant  
6 support, or in clinical practice (as herein).  
7  
8  
9  
10  
11  
12

13  
14 **Strengths and limitations.** This is a real-world study, rather than a clinical trial with  
15 potential for selection bias and the Hawthorne (observer) effect,(28). We assessed  
16 relatively large numbers of adults with T1DM from two independent tertiary hospitals  
17 and did so over a relatively long follow-up period with good numbers of HbA1c  
18 measures from accredited pathology services in both CSII and MDI users, and  
19 fortunately with similar mean HbA1c in both groups. We report both HbA1c CV and  
20 SD and not unexpectedly (given the mathematical derivation of SD from CV), find  
21 similar results with both measures. The study is strengthened by the analysis of GV  
22 over a wide adult age range, as well as by pre-established age groups and by  
23 consideration of gender. As well as a longitudinal observational study there was also  
24 an observation of a group changing from MDI to CSII therapy, and comparison to a  
25 matched group who remained on MDI. There was a similar number of HbA1c  
26 measurements included in the MDI and CSII groups over a long period of follow up  
27 (four years in established users, and 10 years in those who changed from MDI to  
28 CSII). HbA1c GV is a low cost measure that could be calculated from routine clinical  
29 care data (of HbA1c levels), hence is readily applicable to clinical practice (particularly  
30 in the era of electronic medical records), and clinical trials. Study limitations are that  
31 this clinical audit does not include many patients attending private practices, except  
32 for a small subset of the SVH patients who attended a bulk-billing (no cost to patients)  
33 private practice on the public hospital grounds, though in Australia CSII therapy is  
34  
35  
36  
37  
38  
39  
40  
41  
42  
43  
44  
45  
46  
47  
48  
49  
50  
51  
52  
53  
54  
55  
56  
57  
58  
59  
60

1  
2  
3 more commonly provided in public hospitals than in private practice and in order to  
4 obtain their insulin pump most CSII users have private health insurance,(29). We  
5 acknowledge that there may be treatment differences between the two hospital sites  
6 and the bias toward CSII use in the SVH site (due to their interest in and early provision  
7 of CSII services in Australia) may impact results. We addressed this by analysing CSII  
8 and MDI users by hospital location and found similarly lower GV in the CSII groups.  
9 HbA1c measures were performed in different laboratories and likely by different  
10 methodologies, though all laboratories were NATA accredited and participants usually  
11 attended the same pathology provider. Given the observational nature of the study,  
12 we are unable to account for all differences between the MDI and CSII groups,  
13 including treatment adherence, motivation and health literacy. We note that the time  
14 interval between HbA1c measures is shorter for CSII than MDI, and this may reflect  
15 behavioural differences. However, time interval and number of HbA1c measures  
16 were statistically adjusted for in the data analyses. We did not record patient diabetes  
17 education provided to both groups, however all individuals attended clinics with access  
18 to diabetes educators, dieticians and clinicians, that were free of charge to them and  
19 usually at the same clinic visit. We acknowledge that more time may have been spent  
20 with CSII users for initial CSII education,(18), however the initial 12 months of HbA1c  
21 data following CSII commencement, when greater education time was likely provided,  
22 was excluded from the study. Therefore, the observed prolonged benefit on glycaemic  
23 variability is less likely to be due to initial education. In addition, other groups have  
24 demonstrated a benefit in glycaemic control with CSII therapy compared to MDI even  
25 when equal education time was provided,(16). We acknowledge that figures related to  
26 severe hypoglycaemia event rates, retrieved from medical records, may not be  
27 accurate.

1  
2  
3  
4  
5  
6  
7  
8  
9  
10  
11  
12  
13  
14  
15  
16  
17  
18  
19  
20  
21  
22  
23  
24  
25  
26  
27  
28  
29  
30  
31  
32  
33  
34  
35  
36  
37  
38  
39  
40  
41  
42  
43  
44  
45  
46  
47  
48  
49  
50  
51  
52  
53  
54  
55  
56  
57  
58  
59  
60

Future research directions include confirmatory studies in both adult and paediatric groups with T1DM, linkage of both short and long-term measures of glucose variability to hard clinical events and the effects of pumps with RT-CGM, closed loop insulin delivery systems, bihormonal pumps and insulin adjunct therapies (such as SGLT2 inhibitors, metformin and incretin modulating drugs) on glycaemic variability. Mechanistic studies exploring the clinical, cellular and molecular effects of glycaemic variability are also of relevance. It is imperative that further research addresses the cost benefits of CSII therapy and of RT-CGM therapy to facilitate equitable technology access. Analyses of long-term outcome data to determine recommended HbA1c GV targets are also desirable.

In summary, this study has shown that CSII use is associated with lower HbA1c glycaemic variability in adults with T1DM. HbA1c variability, a simple and low cost measure, thought to modulate chronic diabetes complication risk, should be a routine tool to assess glycaemic control in clinical practice and in clinical research and trials.

## **ACKNOWLEDGMENTS**

Authors thank all patients, clinicians, scientists and administration team members in the participating clinics.

## **AUTHOR CONTRIBUTIONS**

ES researched the RNS data, analysed the data and wrote the manuscript. RM contributed to RNS data collection and reviewed the manuscript. ASJ facilitated SVH data collection and reviewed the manuscript. DC contributed to SVH data collection.

1  
2  
3 AH reviewed the manuscript. DNO contributed to data generation and collection at  
4  
5 SVH and reviewed the manuscript. GF contributed to data generation and collection  
6  
7 at RNSH and reviewed the manuscript. AJJ contributed to study design, data  
8  
9 generation and collection at SVH and contributed to writing of the manuscript. All  
10  
11 authors contributed to data interpretation. AJJ is the guarantor.  
12  
13  
14  
15  
16

## 17 **FUNDING STATEMENT**

18  
19 This research received no specific grant from any funding agency in the public,  
20  
21 commercial or not-for-profit sectors.  
22  
23  
24  
25

## 26 **COMPETING INTERESTS**

27  
28 Funding (scholarships for ES) were provided by NHMRC (Australia), JDRF Australia,  
29  
30 the University of Sydney, and the Royal Australasian College of Physicians Vincent  
31  
32 Fairfax Award. AJJ was supported by a NHMRC Practitioner Fellowship and funding  
33  
34 from the NHMRC Clinical Trials Centre and is a Sydney Medical Foundation School  
35  
36 Fellow. AAH is supported by a career development award from the JDRF Australia  
37  
38 T1D Clinical Research Network.  
39  
40  
41  
42  
43

## 44 **DATA SHARING**

45  
46 This study was a retrospective audit of two tertiary hospital medical records. We do  
47  
48 not have ethics approval to share this data.  
49  
50  
51  
52

## 53 **REFERENCES**

54  
55  
56  
57  
58  
59  
60

- 1  
2  
3 1. The effect of intensive treatment of diabetes on the development and  
4 progression of long-term complications in insulin-dependent diabetes mellitus. The  
5 Diabetes Control and Complications Trial Research Group. *The New England journal*  
6 *of medicine*. 1993;329(14):977-86.  
7  
8
- 9  
10  
11 2. Piconi L, Quagliaro L, Assaloni R, et al. Constant and intermittent high glucose  
12 enhances endothelial cell apoptosis through mitochondrial superoxide overproduction.  
13 *Diabetes/metabolism research and reviews*. 2006;22(3):198-203.  
14  
15
- 16  
17 3. Polhill TS, Saad S, Poronnik P, et al. Short-term peaks in glucose promote renal  
18 fibrogenesis independently of total glucose exposure. *American journal of physiology*  
19 *Renal physiology*. 2004;287(2):F268-73.  
20  
21
- 22  
23 4. Ceriello A, Esposito K, Piconi L, et al. Oscillating glucose is more deleterious to  
24 endothelial function and oxidative stress than mean glucose in normal and type 2  
25 diabetic patients. *Diabetes*. 2008;57(5):1349-54.  
26  
27
- 28  
29 5. Steineck I, Cederholm J, Eliasson B, et al. Insulin pump therapy, multiple daily  
30 injections, and cardiovascular mortality in 18,168 people with type 1 diabetes:  
31 observational study. *Bmj*. 2015;350:h3234.  
32  
33
- 34  
35 6. Kilpatrick ES, Rigby AS, Atkin SL. A1C variability and the risk of microvascular  
36 complications in type 1 diabetes: data from the Diabetes Control and Complications  
37 Trial. *Diabetes care*. 2008;31(11):2198-202.  
38  
39
- 40  
41 7. Virk SA, Donaghue KC, Cho YH, et al. Association Between HbA1c Variability  
42 and Risk of Microvascular Complications in Adolescents With Type 1 Diabetes. *The*  
43 *Journal of clinical endocrinology and metabolism*. 2016;101(9):3257-63.  
44  
45
- 46  
47 8. Zabeen B, Craig ME, Virk SA, et al. Insulin Pump Therapy Is Associated with  
48 Lower Rates of Retinopathy and Peripheral Nerve Abnormality. *PloS one*.  
49 2016;11(4):e0153033.  
50  
51  
52  
53  
54  
55  
56  
57  
58  
59  
60

- 1  
2  
3 9. Misso ML, Egberts KJ, Page M, et al. Continuous subcutaneous insulin infusion  
4 (CSII) versus multiple insulin injections for type 1 diabetes mellitus. *The Cochrane*  
5 *database of systematic reviews*. 2010(1):CD005103.  
6  
7
- 8  
9  
10 10. Lepore G, Corsi A, Dodesini AR, et al. Continuous subcutaneous insulin  
11 infusion is better than multiple daily insulin injections in reducing glucose variability  
12 only in type 1 diabetes with good metabolic control. *Diabetes care*. 2010;33(6):e81.  
13  
14
- 15 11. Simon B, Treat V, Marco C, et al. A comparison of glycaemic variability in CSII  
16 vs. MDI treated type 1 diabetic patients using CGMS. *International journal of clinical*  
17 *practice*. 2008;62(12):1858-63.  
18  
19
- 20 12. Alemzadeh R, Palma-Sisto P, Parton EA, et al. Continuous subcutaneous  
21 insulin infusion and multiple dose of insulin regimen display similar patterns of blood  
22 glucose excursions in pediatric type 1 diabetes. *Diabetes technology & therapeutics*.  
23 2005;7(4):587-96.  
24  
25
- 26 13. Fendler W, Baranowska AI, Mianowska B, et al. Three-year comparison of  
27 subcutaneous insulin pump treatment with multi-daily injections on HbA1c, its  
28 variability and hospital burden of children with type 1 diabetes. *Acta diabetologica*.  
29 2012;49(5):363-70.  
30  
31
- 32 14. Jenkins AJ, Krishnamurthy B, Best JD, et al. Evaluation of an algorithm to guide  
33 patients with type 1 diabetes treated with continuous subcutaneous insulin infusion on  
34 how to respond to real-time continuous glucose levels: a randomized controlled trial.  
35 *Diabetes care*. 2010;33(6):1242-8.  
36  
37
- 38 15. Census of Population and Housing: socio-economic indexes for areas (SEIFA)  
39 Australia [Internet]. 2011 [cited 1/11/17]. Available from:  
40 <http://www.abs.gov.au/AUSSTATS/abs@.nsf/DetailsPage/2039.02006>.  
41  
42  
43  
44  
45  
46  
47  
48  
49  
50  
51  
52  
53  
54  
55  
56  
57  
58  
59  
60

- 1  
2  
3 16. Cohen ND, Hong ES, Van Drie C, et al. Long-term metabolic effects of  
4 continuous subcutaneous insulin infusion therapy in type 1 diabetes. *Diabetes*  
5 *technology & therapeutics*. 2013;15(7):544-9.  
6  
7  
8  
9  
10 17. Calandro D, Januszewski A, Cuper K, et al. Substantial and sustained HbA1c  
11 reductions in Australian insulin pump services for adults with type 1 diabetes.  
12 *Madridge J Dia*. 2016;1(1):23-39.  
13  
14  
15  
16  
17 18. Xu S, Alexander K, Bryant W, et al. Healthcare professional requirements for  
18 the care of adult diabetes patients managed with insulin pumps in Australia. *Intern*  
19 *Med J*. 2015;45(1):86-93.  
20  
21  
22  
23  
24 19. Rosenlund S, Hansen TW, Andersen S, et al. Effect of 4 years subcutaneous  
25 insulin infusion treatment on albuminuria, kidney function and HbA1c compared with  
26 multiple daily injections: a longitudinal follow-up study. *Diabetic medicine : a journal of*  
27 *the British Diabetic Association*. 2015;32(11):1445-52.  
28  
29  
30  
31  
32  
33 20. Scott ES, McGrath RT, Januszewski AS, et al. Short-term glucose variability in  
34 adults with Type 1 diabetes does not differ between insulin pump and multiple daily  
35 injection users - a masked continuous glucose monitoring study in clinical practice.  
36  
37  
38  
39  
40 *Diabetes Metab*. 2018.  
41  
42  
43 21. Danne T, Nimri R, Battelino T, et al. International Consensus on Use of  
44 Continuous Glucose Monitoring. *Diabetes care*. 2017;40(12):1631-40.  
45  
46  
47  
48 22. Harrington J, Pena AS, Wilson L, et al. Vascular function and glucose variability  
49 improve transiently following initiation of continuous subcutaneous insulin infusion in  
50 children with type 1 diabetes. *Pediatric diabetes*. 2013;14(7):504-11.  
51  
52  
53  
54 23. Buse JB, Kudva YC, Battelino T, et al. Effects of sensor-augmented pump  
55 therapy on glycemic variability in well-controlled type 1 diabetes in the STAR 3 study.  
56  
57  
58  
59 *Diabetes technology & therapeutics*. 2012;14(7):644-7.  
60

- 1  
2  
3 24. Soupal J, Petruzelkova L, Flekac M, et al. Comparison of Different Treatment  
4 Modalities for Type 1 Diabetes, Including Sensor-Augmented Insulin Regimens, in 52  
5 Weeks of Follow-Up: A COMISAIR Study. *Diabetes technology & therapeutics*.  
6 2016;18(9):532-8.  
7  
8  
9  
10  
11  
12 25. Rosenlund S, Hansen TW, Rossing P, et al. Effect of Sensor-Augmented Pump  
13 Treatment Versus Multiple Daily Injections on Albuminuria: A 1-Year Randomized  
14 Study. *The Journal of clinical endocrinology and metabolism*. 2015;100(11):4181-8.  
15  
16  
17  
18 26. Renard E, Farret A, Kropff J, et al. Day-and-Night Closed-Loop Glucose Control  
19 in Patients With Type 1 Diabetes Under Free-Living Conditions: Results of a Single-  
20 Arm 1-Month Experience Compared With a Previously Reported Feasibility Study of  
21 Evening and Night at Home. *Diabetes care*. 2016;39(7):1151-60.  
22  
23  
24  
25  
26  
27  
28 27. Garg SK, Weinzimer SA, Tamborlane WV, et al. Glucose Outcomes with the  
29 In-Home Use of a Hybrid Closed-Loop Insulin Delivery System in Adolescents and  
30 Adults with Type 1 Diabetes. *Diabetes technology & therapeutics*. 2017;19(3):155-63.  
31  
32  
33  
34  
35 28. McCambridge J, Witton J, Elbourne DR. Systematic review of the Hawthorne  
36 effect: new concepts are needed to study research participation effects. *J Clin*  
37 *Epidemiol*. 2014;67(3):267-77.  
38  
39  
40  
41  
42 29. Insulin pump use in Australia [Internet]. 2012 [cited February 16 2017].  
43 Available from: <http://aihw.gov.au>.  
44  
45  
46  
47  
48  
49  
50  
51  
52  
53  
54  
55  
56  
57  
58  
59  
60



## FIGURE LEGENDS

**Figure 1.** Long-term glycaemic (HbA1c) variability in 164 CSII and 342 MDI participants. Standard deviation of HbA1c over follow-up ( $0.5 \pm 0.4$  % [ $6 \pm 6$ ] mmol/mol) CSII, ( $0.7 \pm 0.7$  % [ $9 \pm 8$ ] mmol/mol) MDI) (A) and coefficient of variation (CV) of HbA1c over follow-up ( $6.7 \pm 4.6$  % [ $10 \pm 10$ ] mmol/mol) CSII, ( $9.3 \pm 7.3$  % [ $14 \pm 13$ ] mmol/mol) MDI) (B). Black bars = CSII; white bars = MDI. Graphed values are Mean +/- SEM.  $P < 0.001$ .

**Figure 2.** Long-term glycaemic variability by pre-defined age groups. Adults aged 18 - 26 y (n = 54 on CSII, n = 69 on MDI) standard deviation of HbA1c ( $0.6 \pm 0.4$  % [ $7 \pm 8$ ] mmol/mol) CSII, ( $0.9 \pm 0.6$  % [ $11 \pm 7$ ] mmol/mol) MDI;  $P = 0.001$ ) (A) and coefficient of variation HbA1c over follow-up ( $7.3 \pm 5.5$  % [ $12 \pm 16$ ] mmol/mol) CSII, ( $10.5 \pm 5.9$  % [ $16 \pm 12$ ] mmol/mol) MDI ;  $P = 0.002$ ) (B). Adults aged  $\geq 26$  y (110 CSII, 273 MDI) standard deviation of HbA1c ( $0.5 \pm 0.4$  % [ $5 \pm 4$ ] mmol/mol) CSII, ( $0.7 \pm 0.7$  % [ $9 \pm 8$ ] mmol/mol) MDI;  $P < 0.001$ ) (C) and coefficient of variation over follow-up ( $6.3 \pm 4.2$  % [ $9 \pm 5$ ] mmol/mol) CSII, ( $8.9 \pm 7.6$  % [ $14 \pm 13$ ] mmol/mol) MDI;  $P < 0.001$ ) (D). Black bars = CSII; white bars = MDI. Graphed values are mean +/- SEM.

**Figure 3.** Long-term glycaemic variability in individuals changing from MDI to CSII therapy. Fifty-six adults changed from MDI to CSII therapy over the study. Mean HbA1c over follow-up ( $P < 0.001$ ) (A), standard deviation of HbA1c ( $P < 0.001$ ) (B) and coefficient of variation of HbA1c over follow-up ( $P = 0.004$ ) (C). Black circles = MDI; white squares = CSII. Graphed values are mean pre- and post-therapy change.

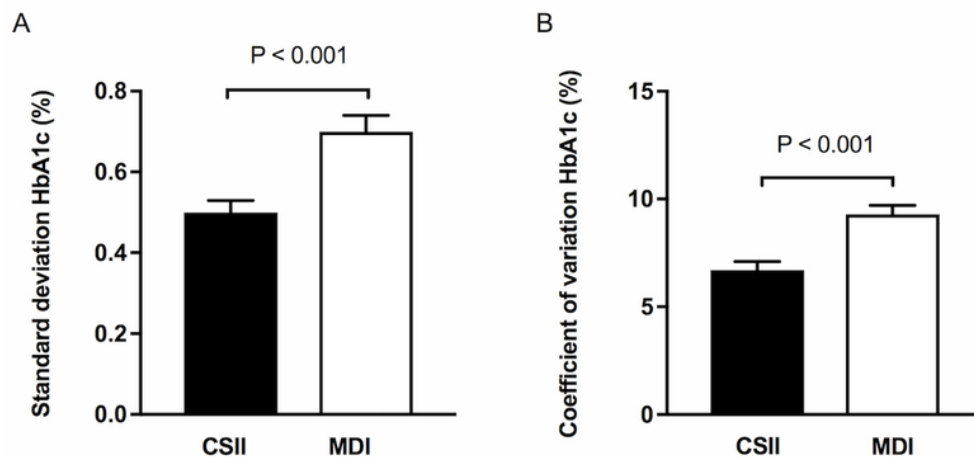

Figure 1. Long-term glycaemic (HbA1c) variability in 164 CSII and 342 MDI participants. Standard deviation of HbA1c over follow-up (0.5  $\pm$  0.4 % [6  $\pm$  6] mmol/mol) CSII, (0.7  $\pm$  0.7 % [9  $\pm$  8] mmol/mol) MDI) (A) and coefficient of variation (CV) of HbA1c over follow-up (6.7  $\pm$  4.6 % [10  $\pm$  10] mmol/mol) CSII, (9.3  $\pm$  7.3 % [14  $\pm$  13] mmol/mol) MDI) (B). Black bars = CSII; white bars = MDI. Graphed values are Mean  $\pm$  SEM. P < 0.001.

66x49mm (300 x 300 DPI)

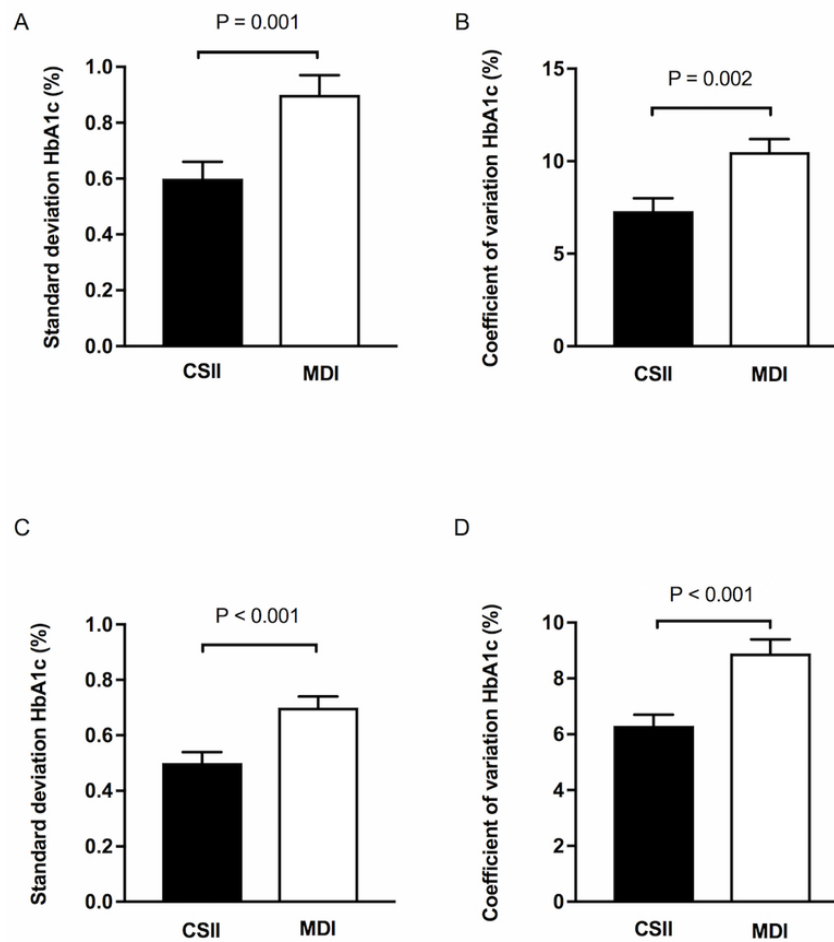

Figure 2. Long-term glycaemic variability by pre-defined age groups. Adults aged 18 - 26 y (n = 54 on CSII, n = 69 on MDI) standard deviation of HbA1c (0.6 ± 0.4 % [7 ± 8] mmol/mol) CSII, 0.9 ± 0.6 % [11 ± 7] mmol/mol) MDI; P = 0.001) (A) and coefficient of variation HbA1c over follow-up (7.3 ± 5.5 % [12 ± 16] mmol/mol) CSII, 10.5 ± 5.9 % [16 ± 12] mmol/mol) MDI ; P = 0.002) (B). Adults aged ≥ 26 y (110 CSII, 273 MDI) standard deviation of HbA1c (0.5 ± 0.4 % [5 ± 4] mmol/mol) CSII, 0.7 ± 0.7 % [9 ± 8] mmol/mol) MDI; P < 0.001) (C) and coefficient of variation over follow-up (6.3 ± 4.2 % [9 ± 5] mmol/mol) CSII, 8.9 ± 7.6 % [14 ± 13] mmol/mol) MDI; P < 0.001) (D). Black bars = CSII; white bars = MDI. Graphed values are mean ± SEM.

66x93mm (300 x 300 DPI)

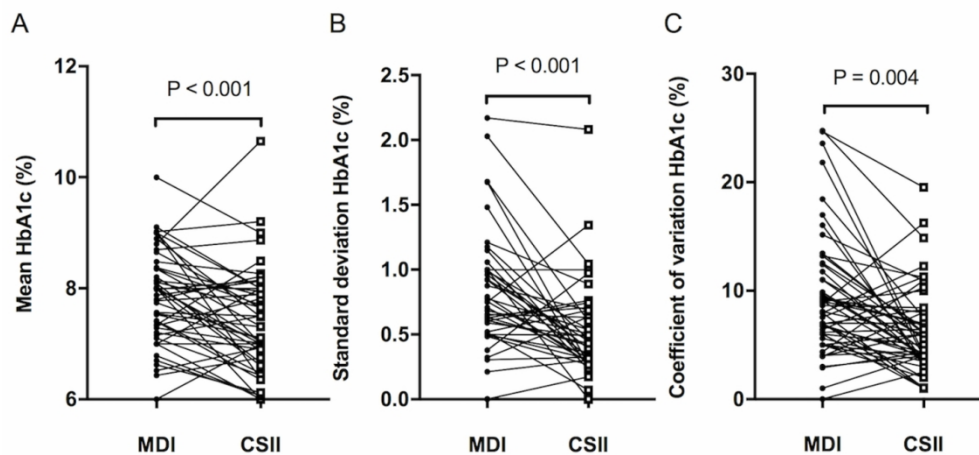

Figure 3. Long-term glycaemic variability in individuals changing from MDI to CSII therapy. Fifty-six adults changed from MDI to CSII therapy over the study. Mean HbA1c over follow-up ( $P < 0.001$ ) (A), standard deviation of HbA1c ( $P < 0.001$ ) (B) and coefficient of variation of HbA1c over follow-up ( $P = 0.004$ ) (C). Black circles = MDI; white squares = CSII. Graphed values are mean pre- and post-therapy change.

125x59mm (300 x 300 DPI)

**Supplementary Table 1.** " #\$\$%&'#!&(')'&\*+)\$,\*\$&,-.!'/0#\*,!1\$\*(!234+!5!/!'6+\*+,!63!  
#-&'\*\$-%7!

| <b>Location!</b>                       | <b>Royal North Shore Hospital!</b> | <b>St Vincent's Hospital</b> | <b>P value !</b>    |
|----------------------------------------|------------------------------------|------------------------------|---------------------|
| 8!                                     | 9:;!                               | 55<!                         |                     |
| " =>!?!%!?@AA!                         | :B!?!<;7:A!                        | CC!?!DB7:A!                  | <b>&lt;0.001</b>    |
| EF+!?!3+'),A!                          | 9B±5C!                             | 9C±5<!                       | G7<9!               |
| H- I +%!?!%!?@AA!                      | 5B:?!C<A!                          | CD!?!DBA!                    | <b>0.049!</b>       |
| J+'),!-./!/\$'6+*+,!                   | 5K±5;!                             | 5B±59!                       | G7;K!               |
| J+'),!" =>!*(+)'43!                    | D±;!                               | K±9!                         | <b>0.026!</b>       |
| L',&O#')!&- I4#&'*\$-%,!?%!?@AAM!      | 5C5!?!;5A!                         | 95!?!9GA!                    | <b>0.04!</b>        |
| =+N+)+!(34-F#3&' + I \$' !?!%!?@AAO!   | B;!?!<<A!                          | P!                           | -                   |
| =-&\$-+&-%- I \$&! , '*O, !?/+&\$#+AQ! | !                                  | !                            |                     |
| E/N' %* ' F+IR!S\$, ' /N' %* ' F+!     | !                                  | !                            |                     |
| T/O&'*\$-%!U!-&&04'*\$-%!              | :±<!                               | K±<!                         | <b>&lt; 0.001!</b>  |
|                                        | :±<!                               | K±9!                         | <b>&lt; 0.001!</b>  |
| J+'),!-##- 1P04!!                      | 97G±57:!                           | K7G±D7:!                     | <b>&lt; 0.001!!</b> |
| V6E5&! I +', O)+, !?!%A!               | K±;!                               | 5D±59!                       | <b>&lt; 0.001!</b>  |
| 2\$ I +!6+*1++%!V6E5&!/?/ ' 3,A!       | <9B±5:K!                           | <9K±5BD!                     | G7:B!               |
| W+ '%!V6E5&!!                          | !                                  | !                            |                     |
| @!!                                    | B7G±57D!!                          | K7K±57D!!                    | G7GC                |
| X I I -#R I -#Y!                       | XC; ±5CY!                          | XCG±5<Y!                     |                     |

S' \* ' ! ' )+! I + '%! ±! , '\*% / ' ) / ! / +N\$' \*\$-%Z! -)! %! ?4+)&+%' F+A7! ! M! W\$&)-N', &O#')! ' % / !  
I ' &)-N', &O#')!&- I4#&'\*\$-%,7!O!E%3!+4\$, - /+! - .! , +N+)+! (34-F#3&+ ' I \$' !)+&-) / + / ! \$ % !  
\*(+! I + / \$ & ' #!)+&-) / 7!  
!

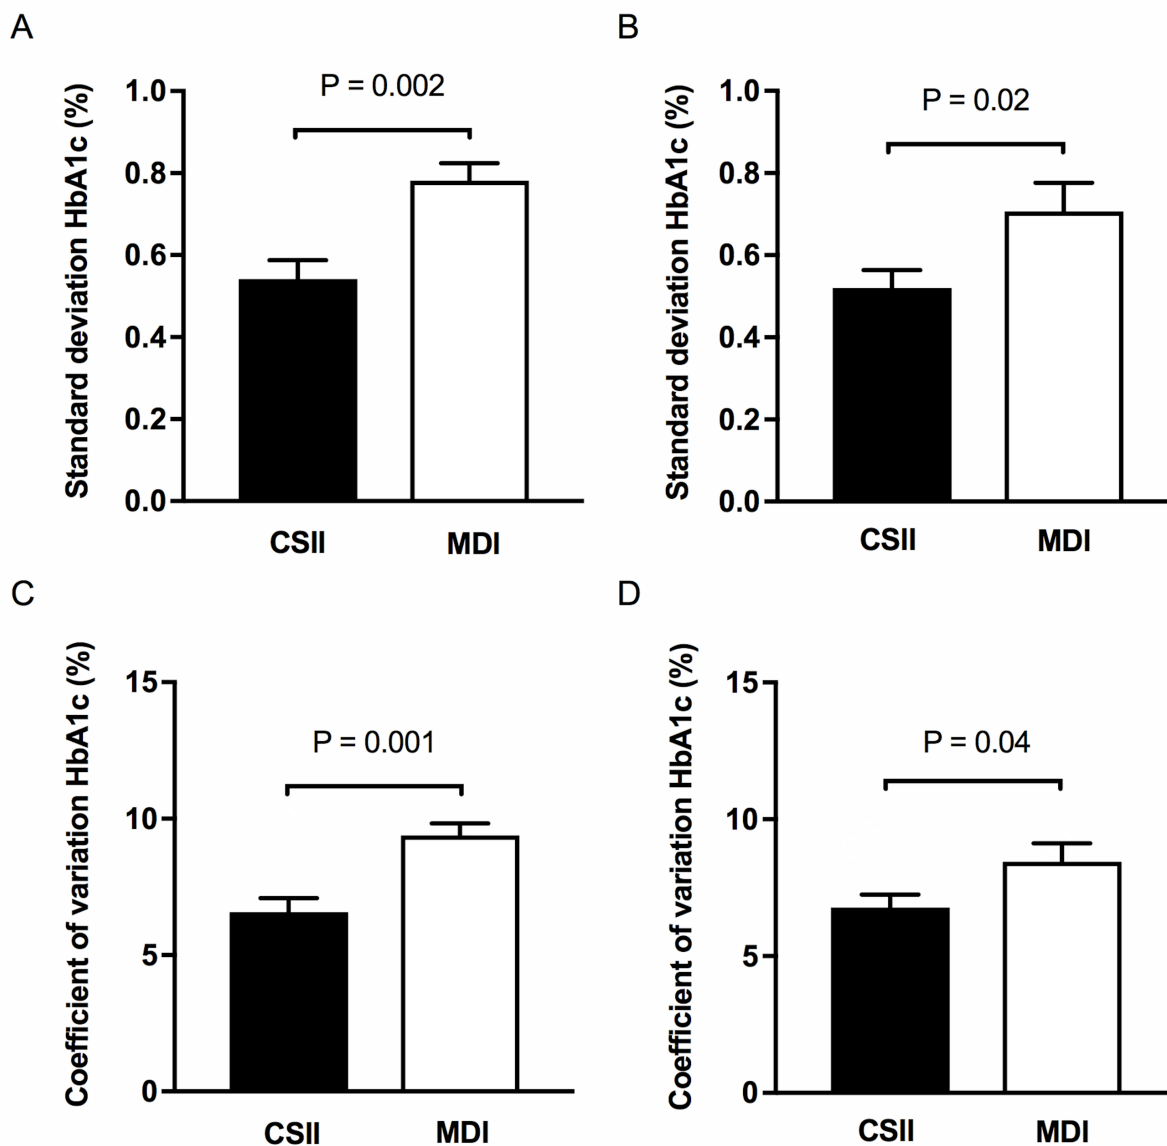

**Supplementary Figure 1.** [ -%FP\*+) I I F#3& ' + I \$&! N ') \$ ' 6\$#\*3! \$%! " =>>! ' % / ! WS>! 4 ') \*\$&\$4 ' % \* , ! 63! ( - , 4\$\* ' #!# - & ' \*\$ - % 7! ! = \* ' % / ' ) / ! / + N\$ ' \*\$ - % ! - . ! V6E5&! - N+ ) ! . - # - 1 P04! ? G7D! ± ! G7D! @ ! X C ! ± ! K Y ! I I - # R I - # A ! " =>>Z! ? G7B! ± ! G7K! @ ! X : ! ± ! B Y ! I I - # R I - # A ! W S > Z ! \ - 3 ' # ! 8 - ) \* ( ! = ( - ) + ! V - , 4\$\* ' # ! ? E A ! ' % / ! , \* ' % / ' ) / ! / + N\$ ' \*\$ - % ! - . ! V6E5&! ? G7D! ± ! G7 ; ! @ ! X C ± ! ; Y ! I I - # R I - # A ! " =>>Z!

1  
2  
3  
4  
5  
6  
7  
8  
9  
10  
11  
12  
13  
14  
15  
16  
17  
18  
19  
20  
21  
22  
23  
24  
25  
26  
27  
28  
29  
30  
31  
32  
33  
34  
35  
36  
37  
38  
39  
40  
41  
42  
43  
44  
45  
46  
47  
48  
49  
50  
51  
52  
53  
54  
55  
56  
57  
58  
59  
60

?G7K!±!G7D!@!X55!±!:Y! I I -#R I -#A!WS>Z! =\*!L\$%&+%\*], !V - , 4\$\* '#! ? ^A7!! " - + ..\$&\$+%\*! - .!N')\$'\*\$- %!  
- .!V6E5&! - N+)!. -## - 1 P04! ?C7C! ±!D75! @!X5G! ±!5<Y! I I -#R I -#A! " ==>Z! ? : 7 ; !! ±!K7K! @!X59! ±!55Y!  
I I -#R I -#A!WS>Z! \ - 3' #! 8 - ) \* (! = ( - ) + !V - , 4\$\* '#! ? " A! ' % / ! & - + ..\$&\$+%\*! - .!N')\$'\*\$- %! - .!V6E5&!  
?C7B! ±!97B! @!X: ! ±!DY! I I -#R I -#A! " ==>! ' % / ! ? B7 ; ±! ; 7C! @!X<5! ±! <GY! I I -#R I -#A!WS>Z! =\*!  
L\$%&+%\*], !V - , 4\$\* '#! ? SA7!! ^# ' & \_! 6 ' ) , ! ' ! " ==>a! 1 ( \$\* + ! 6 ' ) , ! ' ! WS>7!! b ) ' 4 ( + / ! N ' # 0 + , ! ' ) +!  
W+ ' %! cRP! = TW7!

For peer review only

**Supplementary Table 2.** " #\$\$%& ' #!& ( ' ) ' &\*+)\$, \*\$&, !-.' /0#\*, !1\$\* (!234+!5!/\$' 6+\*+, !63! ' F+!, 06F)-04, !- !5BP<C!3+ ' ), !' %/ !F)+ ' \*+)\* ( ' %!-)!+d0 '#!\*-!<C!3+ ' ), 7!

|                                                       | 18-26 y!  |            |              | ≥ 26 y!      |             |                   |
|-------------------------------------------------------|-----------|------------|--------------|--------------|-------------|-------------------|
|                                                       | CSII !    | MDI !      | P value !    | CSII !       | MDI !       | P value !         |
| 8!                                                    | D;!       | C:!        | !            | 55G!         | <K9!        | !                 |
| EF+!?'3+ ' ), A!                                      | <G±<!     | <G±<!      | G7DK!        | ; G±55!      | ; ; ±5; !   | <b>0.009!</b>     |
| H - I +%!?'%!?@AA!                                    | 9; !?C9A! | 9G!?' ;9A! | <b>0.03!</b> | K<!?'CDA!    | 55B!?' ;9A! | <b>&lt;0.001!</b> |
| J+ ' ), !- ! /\$' 6+*+, !                             | : ±D!     | B±C!       | G7; B!       | <5±59!       | <G±5D!      | G7DC!             |
| J+ ' ), ! " =>!<br>*(+)' 43!                          | C±9!      | 8RE!       | P!           | C±; !        | 8RE!        | P!                |
| L ' , &O# ' )!<br>&- I 4#&' *\$-%, !<br>?%!?'@AAM!    | D!?' :A!  | 5G!?'5DA!  | G79D!        | ; ; !?' ;5A! | 5<<!?'DGA!  | G75<!             |
| =+N+)+!<br>(34-F#3&' + I \$' !<br>?%!?'@AAO!          | ; !?'5GA! | D!?'5GA!   | G7: C!       | 5G!?'5BA!    | CD!?'<KA!   | G75K!             |
| =- &\$- +&- %- I \$&! !<br>, * ' O, !? / +&\$# +AQ! ! | !         | !          | !            | !            | !           | !                 |
| E / N ' %* ' F+R!<br>S\$, ' / N ' %* ' F+!            | : ±<!     | : ±<!      | G75<!        | B±9!         | : ±<!       | <b>&lt;0.001!</b> |
| T/O&' *\$-%!U!<br>-&&O4' *\$-%!                       | : ±<!     | : ±<!      | G7; 5!       | B±9!         | : ±<!       | <b>&lt;0.001!</b> |
| =*O/3! .-#- 1P<br>O4!?'3+ ' ), A!                     | 9±<7C!    | 97C±; 7G!  | G7DG         | ; 7D±<7K!    | ; 7<±; 7G!  | G7D<!             |
| V6E5&!<br>I + ' , O)+ I +%* , !<br>?%A!               | K±C!      | : ±5G!     | G7; G!!      | : ±B!        | B±B!        | G7; 9!            |
| 2\$ I +!6+*1++%!<br>V6E5&!?' / ' 3, A!                | <<5±<9K!  | <GD±5<K!   | G7C<!        | <G±595!      | <C5±<5C!    | <b>0.019</b>      |
| W+ ' %!V6E5&!!<br>@!!<br>X I I -#R I -#Y!             | !         | !          | !            | !            | !           | !                 |
|                                                       | B79±579!  | B7D±57C!   | G7D<!!       | K7C±575!     | K7: ±57; !  | <b>0.034!</b>     |
|                                                       | XCC±5; Y! | XCB±5BY!   |              | XD: ±5<Y!    | XC<±5CY!!   |                   |

S ' \* ' ' )+! I + ' %! ±! , \* ' % / ' ) / ! / +N\$ ' \*\$-%Z! - )! %! ?4+)&+%\* ' F+A7! ! M! W\$&)-N ' , &O# ' )! ' % / R- )!  
I ' &)-N ' , &O# ' )! &- I 4#&' \*\$-%, 7! ! O! E%3! +4\$, - / +! - ! , +N+)+! (34-F#3&' + I \$' !)+&-) / + / ! \$%!  
\*(+! I + / \$&' #!)+&-) / 7!

!  
!



**Supplementary Table 3.** [ - %FP\*+ ) I !F#3& ' + I \$&!N ' )\$ ' 6\$#\*3!\$%!\$% / \$N\$/O ' # , !& ( ' %F\$%F!.) - I !  
 WS>!\* - ! " =>>!\* ( + ) ' 43!63!F+%/ +)7!!!

| Gender!                                     | Male (n = 15)!             |                           |                    | Female (n= 41)             |                           |                       |
|---------------------------------------------|----------------------------|---------------------------|--------------------|----------------------------|---------------------------|-----------------------|
|                                             | MDI (pre)                  | CSII (post)               | P value            | MDI (pre)                  | CSII (post)               | P value               |
| W+ ' %!V6E5&!!<br>@!!<br>X   I   -#R   -#Y! | !<br>K7B±G7K!!<br>XC<±BY!  | !<br>K7; ±G7B!<br>XDK±BY! | !<br><b>0.014</b>  | !<br>K7: ±G7B!<br>XC<±: Y! | !<br>K79±57G!<br>XDK±5GY! | !<br><b>0.001</b>     |
| =S!V6E5&!!<br>@!!<br>X   I   -#R   -#Y!     | !<br>G7C±G7;!<br>XK±; Y!   | !<br>G7; ±G7<!<br>X; ±<Y! | !<br><b>0.007!</b> | !<br>G7B±G7D!<br>XB±DY!    | !<br>G7D±G7;!<br>XD±; Y!  | !<br><b>&lt;0.001</b> |
| " L!V6E5&!!<br>@!!<br>X   I   -#R   -#Y!    | !<br>K7: ±; 7D!<br>X55±CY! | !<br>D75±97<!<br>XK±DY!   | !<br><b>0.013!</b> | !<br>:7K±D7B!<br>X5; ±B!Y  | !<br>C7; ±; 75!<br>X: ±CY | !<br><b>0.001</b>     |

1  
2  
3  
4  
5  
6  
7  
8  
9  
10  
11  
12  
13  
14  
15  
16  
17  
18  
19  
20  
21  
22  
23  
24  
25  
26  
27  
28  
29  
30  
31  
32  
33  
34  
35  
36  
37  
38  
39  
40  
41  
42  
43  
44  
45  
46  
47  
48  
49  
50  
51  
52  
53  
54  
55  
56  
57  
58  
59  
60

For peer review only

# Reporting checklist for cohort study.

Based on the STROBE cohort guidelines.

## Instructions to authors

Complete this checklist by entering the page numbers from your manuscript where readers will find each of the items listed below.

Your article may not currently address all the items on the checklist. Please modify your text to include the missing information. If you are certain that an item does not apply, please write "n/a" and provide a short explanation.

Upload your completed checklist as an extra file when you submit to a journal.

In your methods section, say that you used the STROBE cohort reporting guidelines, and cite them as:

von Elm E, Altman DG, Egger M, Pocock SJ, Gøtzsche PC, Vandenbroucke JP. The Strengthening of Reporting of Observational Studies in Epidemiology (STROBE) Statement: guidelines for reporting observational studies.

|                           |                     |                                                                                                 | Page<br>Number |
|---------------------------|---------------------|-------------------------------------------------------------------------------------------------|----------------|
| <b>Title and abstract</b> |                     |                                                                                                 |                |
| Title                     | <a href="#">#1a</a> | Indicate the study's design with a commonly used term in the title or the abstract              | 3              |
| Abstract                  | <a href="#">#1b</a> | Provide in the abstract an informative and balanced summary of what was done and what was found | 3              |
| <b>Introduction</b>       |                     |                                                                                                 |                |
| Background / rationale    | <a href="#">#2</a>  | Explain the scientific background and rationale for the investigation being reported            | 4              |
| Objectives                | <a href="#">#3</a>  | State specific objectives, including any prespecified hypotheses                                | 5              |
| <b>Methods</b>            |                     |                                                                                                 |                |
| Study design              | <a href="#">#4</a>  | Present key elements of study design early in the paper                                         | 6              |
| Setting                   | <a href="#">#5</a>  | Describe the setting, locations, and relevant dates, including periods of                       | 6              |

|    |                      |                                                                                                |     |
|----|----------------------|------------------------------------------------------------------------------------------------|-----|
|    |                      | recruitment, exposure, follow-up, and data collection                                          |     |
| 1  |                      |                                                                                                |     |
| 2  | Eligibility criteria | <a href="#">#6a</a> Give the eligibility criteria, and the sources and methods of selection of | 6   |
| 3  |                      | participants. Describe methods of follow-up.                                                   |     |
| 4  |                      |                                                                                                |     |
| 5  |                      |                                                                                                |     |
| 6  | Eligibility criteria | <a href="#">#6b</a> For matched studies, give matching criteria and number of exposed and      | 7   |
| 7  |                      | unexposed                                                                                      |     |
| 8  |                      |                                                                                                |     |
| 9  |                      |                                                                                                |     |
| 10 | Variables            | <a href="#">#7</a> Clearly define all outcomes, exposures, predictors, potential               | 6   |
| 11 |                      | confounders, and effect modifiers. Give diagnostic criteria, if applicable                     |     |
| 12 |                      |                                                                                                |     |
| 13 |                      |                                                                                                |     |
| 14 | Data sources /       | <a href="#">#8</a> For each variable of interest give sources of data and details of methods   | 6-7 |
| 15 | measurement          | of assessment (measurement). Describe comparability of assessment                              |     |
| 16 |                      | methods if there is more than one group. Give information separately                           |     |
| 17 |                      | for for exposed and unexposed groups if applicable.                                            |     |
| 18 |                      |                                                                                                |     |
| 19 |                      |                                                                                                |     |
| 20 |                      |                                                                                                |     |
| 21 | Bias                 | <a href="#">#9</a> Describe any efforts to address potential sources of bias                   | 7-8 |
| 22 |                      |                                                                                                |     |
| 23 | Study size           | <a href="#">#10</a> Explain how the study size was arrived at                                  | n/a |
| 24 |                      |                                                                                                |     |
| 25 | Quantitative         | <a href="#">#11</a> Explain how quantitative variables were handled in the analyses. If        | 7-8 |
| 26 | variables            | applicable, describe which groupings were chosen, and why                                      |     |
| 27 |                      |                                                                                                |     |
| 28 |                      |                                                                                                |     |
| 29 | Statistical          | <a href="#">#12a</a> Describe all statistical methods, including those used to control for     | 7-8 |
| 30 | methods              | confounding                                                                                    |     |
| 31 |                      |                                                                                                |     |
| 32 |                      |                                                                                                |     |
| 33 | Statistical          | <a href="#">#12b</a> Describe any methods used to examine subgroups and interactions           | 7-8 |
| 34 | methods              |                                                                                                |     |
| 35 |                      |                                                                                                |     |
| 36 |                      |                                                                                                |     |
| 37 | Statistical          | <a href="#">#12c</a> Explain how missing data were addressed                                   | n/a |
| 38 | methods              |                                                                                                |     |
| 39 |                      |                                                                                                |     |
| 40 |                      |                                                                                                |     |
| 41 | Statistical          | <a href="#">#12d</a> If applicable, explain how loss to follow-up was addressed                | n/a |
| 42 | methods              |                                                                                                |     |
| 43 |                      |                                                                                                |     |
| 44 |                      |                                                                                                |     |
| 45 | Statistical          | <a href="#">#12e</a> Describe any sensitivity analyses                                         | n/a |
| 46 | methods              |                                                                                                |     |
| 47 |                      |                                                                                                |     |
| 48 | <b>Results</b>       |                                                                                                |     |
| 49 |                      |                                                                                                |     |
| 50 |                      |                                                                                                |     |
| 51 | Participants         | <a href="#">#13a</a> Report numbers of individuals at each stage of study—eg numbers           | 8   |
| 52 |                      | potentially eligible, examined for eligibility, confirmed eligible,                            |     |
| 53 |                      | included in the study, completing follow-up, and analysed. Give                                |     |
| 54 |                      | information separately for for exposed and unexposed groups if                                 |     |
| 55 |                      | applicable.                                                                                    |     |
| 56 |                      |                                                                                                |     |
| 57 |                      |                                                                                                |     |
| 58 |                      |                                                                                                |     |
| 59 |                      |                                                                                                |     |
| 60 |                      |                                                                                                |     |

|    |                    |                      |                                                                            |       |
|----|--------------------|----------------------|----------------------------------------------------------------------------|-------|
| 1  | Participants       | <a href="#">#13b</a> | Give reasons for non-participation at each stage                           | n/a   |
| 2  |                    |                      |                                                                            |       |
| 3  | Participants       | <a href="#">#13c</a> | Consider use of a flow diagram                                             | n/a   |
| 4  |                    |                      |                                                                            |       |
| 5  | Descriptive data   | <a href="#">#14a</a> | Give characteristics of study participants (eg demographic, clinical,      | 8     |
| 6  |                    |                      | social) and information on exposures and potential confounders. Give       |       |
| 7  |                    |                      | information separately for exposed and unexposed groups if applicable.     |       |
| 8  |                    |                      |                                                                            |       |
| 9  |                    |                      |                                                                            |       |
| 10 |                    |                      |                                                                            |       |
| 11 | Descriptive data   | <a href="#">#14b</a> | Indicate number of participants with missing data for each variable of     | n/a   |
| 12 |                    |                      | interest                                                                   |       |
| 13 |                    |                      |                                                                            |       |
| 14 |                    |                      |                                                                            |       |
| 15 | Descriptive data   | <a href="#">#14c</a> | Summarise follow-up time (eg, average and total amount)                    | 8     |
| 16 |                    |                      |                                                                            |       |
| 17 | Outcome data       | <a href="#">#15</a>  | Report numbers of outcome events or summary measures over time.            | 9-11  |
| 18 |                    |                      | Give information separately for exposed and unexposed groups if            |       |
| 19 |                    |                      | applicable.                                                                |       |
| 20 |                    |                      |                                                                            |       |
| 21 |                    |                      |                                                                            |       |
| 22 | Main results       | <a href="#">#16a</a> | Give unadjusted estimates and, if applicable, confounder-adjusted          | 9-11  |
| 23 |                    |                      | estimates and their precision (eg, 95% confidence interval). Make clear    |       |
| 24 |                    |                      | which confounders were adjusted for and why they were included             |       |
| 25 |                    |                      |                                                                            |       |
| 26 |                    |                      |                                                                            |       |
| 27 |                    |                      |                                                                            |       |
| 28 | Main results       | <a href="#">#16b</a> | Report category boundaries when continuous variables were categorized      | 9-11  |
| 29 |                    |                      |                                                                            |       |
| 30 | Main results       | <a href="#">#16c</a> | If relevant, consider translating estimates of relative risk into absolute | n/a   |
| 31 |                    |                      | risk for a meaningful time period                                          |       |
| 32 |                    |                      |                                                                            |       |
| 33 |                    |                      |                                                                            |       |
| 34 | Other analyses     | <a href="#">#17</a>  | Report other analyses done—e.g., analyses of subgroups and                 | 10-11 |
| 35 |                    |                      | interactions, and sensitivity analyses                                     |       |
| 36 |                    |                      |                                                                            |       |
| 37 |                    |                      |                                                                            |       |
| 38 | <b>Discussion</b>  |                      |                                                                            |       |
| 39 |                    |                      |                                                                            |       |
| 40 | Key results        | <a href="#">#18</a>  | Summarise key results with reference to study objectives                   | 12    |
| 41 |                    |                      |                                                                            |       |
| 42 | Limitations        | <a href="#">#19</a>  | Discuss limitations of the study, taking into account sources of potential | 16    |
| 43 |                    |                      | bias or imprecision. Discuss both direction and magnitude of any           |       |
| 44 |                    |                      | potential bias.                                                            |       |
| 45 |                    |                      |                                                                            |       |
| 46 |                    |                      |                                                                            |       |
| 47 |                    |                      |                                                                            |       |
| 48 | Interpretation     | <a href="#">#20</a>  | Give a cautious overall interpretation considering objectives,             | 12-17 |
| 49 |                    |                      | limitations, multiplicity of analyses, results from similar studies, and   |       |
| 50 |                    |                      | other relevant evidence.                                                   |       |
| 51 |                    |                      |                                                                            |       |
| 52 |                    |                      |                                                                            |       |
| 53 | Generalisability   | <a href="#">#21</a>  | Discuss the generalisability (external validity) of the study results      | 12-17 |
| 54 |                    |                      |                                                                            |       |
| 55 | <b>Other</b>       |                      |                                                                            |       |
| 56 |                    |                      |                                                                            |       |
| 57 | <b>Information</b> |                      |                                                                            |       |
| 58 |                    |                      |                                                                            |       |
| 59 |                    |                      |                                                                            |       |
| 60 |                    |                      |                                                                            |       |

1 Funding [#22](#) Give the source of funding and the role of the funders for the present 19  
2 study and, if applicable, for the original study on which the present  
3 article is based  
4  
5

6 None The STROBE checklist is distributed under the terms of the Creative Commons Attribution License CC-  
7 BY. This checklist can be completed online using <https://www.goodreports.org/>, a tool made by the [EQUATOR](#)  
8 [Network](#) in collaboration with [Penelope.ai](#)  
9  
10  
11  
12  
13  
14  
15  
16  
17  
18  
19  
20  
21  
22  
23  
24  
25  
26  
27  
28  
29  
30  
31  
32  
33  
34  
35  
36  
37  
38  
39  
40  
41  
42  
43  
44  
45  
46  
47  
48  
49  
50  
51  
52  
53  
54  
55  
56  
57  
58  
59  
60

# BMJ Open

## HbA1c Variability in Adults With Type 1 Diabetes on Continuous Subcutaneous Insulin Infusion (CSII) Therapy Compared To Multiple Daily Injection (MDI) Treatment.

|                                 |                                                                                                                                                                                                                                                                                                                                                                                                                                                                                                                                                                                                                                                                                                                                                                                                                                                                                                                                                                 |
|---------------------------------|-----------------------------------------------------------------------------------------------------------------------------------------------------------------------------------------------------------------------------------------------------------------------------------------------------------------------------------------------------------------------------------------------------------------------------------------------------------------------------------------------------------------------------------------------------------------------------------------------------------------------------------------------------------------------------------------------------------------------------------------------------------------------------------------------------------------------------------------------------------------------------------------------------------------------------------------------------------------|
| Journal:                        | <i>BMJ Open</i>                                                                                                                                                                                                                                                                                                                                                                                                                                                                                                                                                                                                                                                                                                                                                                                                                                                                                                                                                 |
| Manuscript ID                   | bmjopen-2019-033059.R1                                                                                                                                                                                                                                                                                                                                                                                                                                                                                                                                                                                                                                                                                                                                                                                                                                                                                                                                          |
| Article Type:                   | Original research                                                                                                                                                                                                                                                                                                                                                                                                                                                                                                                                                                                                                                                                                                                                                                                                                                                                                                                                               |
| Date Submitted by the Author:   | 23-Nov-2019                                                                                                                                                                                                                                                                                                                                                                                                                                                                                                                                                                                                                                                                                                                                                                                                                                                                                                                                                     |
| Complete List of Authors:       | Scott, Emma; NHMRC Clinical Trials Centre; Royal North Shore Hospital, Department of Diabetes, Endocrinology and Metabolism<br>McGrath, Rachel; Royal North Shore Hospital, Department of Diabetes, Endocrinology and Metabolism ; University of Sydney, Northern Clinical School, Faculty of Medicine<br>Januszewski, Andrzej; NHMRC Clinical Trials Centre; The University of Melbourne Medicine at St Vincent's Hospital<br>Calandro, Daniel; NHMRC Clinical Trials Centre<br>Hardikar, Anandwardhan; NHMRC Clinical Trials Centre<br>O'Neal, David; University of Melbourne, Department of Medicine; St Vincent's Hospital Melbourne, Department of Endocrinology and Diabetes<br>Fulcher, Gregory; Royal North Shore Hospital, Department of Diabetes, Endocrinology and Metabolism; University of Sydney, Northern Clinical School, Faculty of Medicine<br>Jenkins, Alicia; University of Melbourne, Department of Medicine; NHMRC Clinical Trials Centre |
| <b>Primary Subject Heading</b>: | Diabetes and endocrinology                                                                                                                                                                                                                                                                                                                                                                                                                                                                                                                                                                                                                                                                                                                                                                                                                                                                                                                                      |
| Secondary Subject Heading:      | Diabetes and endocrinology, Medical management                                                                                                                                                                                                                                                                                                                                                                                                                                                                                                                                                                                                                                                                                                                                                                                                                                                                                                                  |
| Keywords:                       | General diabetes < DIABETES & ENDOCRINOLOGY, Diabetes & endocrinology < INTERNAL MEDICINE, Paediatric endocrinology < DIABETES & ENDOCRINOLOGY                                                                                                                                                                                                                                                                                                                                                                                                                                                                                                                                                                                                                                                                                                                                                                                                                  |
|                                 |                                                                                                                                                                                                                                                                                                                                                                                                                                                                                                                                                                                                                                                                                                                                                                                                                                                                                                                                                                 |

SCHOLARONE™  
Manuscripts

1  
2  
3 HbA1c Variability in Adults With Type 1 Diabetes on Continuous Subcutaneous  
4 Insulin Infusion (CSII) Therapy Compared To Multiple Daily Injection (MDI)  
5  
6 Treatment.  
7  
8  
9  
10  
11

12 Type 1 Diabetes Insulin Delivery Mode and Glycaemic Variability  
13  
14  
15  
16

17 E S Scott MBBS<sup>a,b</sup>

18 R T McGrath PhD<sup>b,c</sup>

19 A S Januszewski PhD<sup>a,d,e</sup>

20 D Calandro MD<sup>a</sup>

21 A A Hardikar, PhD<sup>a</sup>

22 D N O'Neal, MD <sup>a,d,e</sup>

23 G R Fulcher MD <sup>b,c</sup>

24 A J Jenkins, MD <sup>a,d,e</sup>

25  
26  
27  
28  
29  
30  
31  
32  
33  
34  
35  
36  
37 a. NHMRC Clinical Trials Centre, University of Sydney, Sydney, New South Wales,  
38 Australia  
39

40  
41  
42 b. Department of Diabetes, Endocrinology and Metabolism, Royal North Shore  
43 Hospital, Sydney, New South Wales, Australia  
44  
45

46  
47 c., The University of Sydney Northern Clinical School, Faculty of Medicine and  
48 Health, Sydney, New South Wales, Australia  
49

50  
51 d. Department of Endocrinology and Diabetes, St Vincent's Hospital, Melbourne,  
52 Victoria, Australia  
53

54  
55 e. University of Melbourne, Department of Medicine, St. Vincent's, Melbourne,  
56 Victoria, Australia  
57  
58  
59  
60



1  
2  
3  
4  
5 **Corresponding author:**  
6

7 Prof. Alicia Jenkins  
8

9  
10 Address. L6, 92-94 Parramatta Rd, Camperdown NSW 2050 Australia  
11

12 Phone. +61 2 9562 5000 Fax. +61 2 9565 1863  
13

14 Email: alicia.jenkins@ctc.usyd.edu.au  
15  
16  
17  
18

19 **Word Count:** Abstract 279. Article: 3717 (main text and acknowledgements).  
20  
21  
22

23  
24 Number of tables: 3 in article. Number of figures: 3 in article.  
25

26 Number of Supplementary tables: 3. Number of Supplementary figures: 1.  
27  
28  
29  
30  
31  
32  
33  
34  
35  
36  
37  
38  
39  
40  
41  
42  
43  
44  
45  
46  
47  
48  
49  
50  
51  
52  
53  
54  
55  
56  
57  
58  
59  
60

## ABSTRACT

**Objective:** To determine if continuous subcutaneous insulin infusion (CSII) therapy is associated with lower HbA1c variability (long-term glycaemic variability GV) relative to multiple daily injection (MDI) treatment in adults with Type 1 diabetes (T1DM).

**Design:** Retrospective audit

**Setting and participants:** Clinic records from 506 adults with T1DM from two tertiary Australian hospitals.

**Outcome measures:** Long-term GV was assessed by HbA1c standard deviation (SD) and coefficient of variation (CV) in adults on established MDI or CSII therapy, and in a subset changing from MDI to CSII.

**Results:** Adults (n = 506, (164 CSII), 50% women, mean  $\pm$  SD age  $38.0 \pm 15.3$  yrs,  $17.0 \pm 13.7$  yrs diabetes, mean HbA1c  $7.8 \pm 1.2\%$  [ $62 \pm 13$  mmol/mol] on CSII,  $8.0 \pm 1.5\%$  [ $64 \pm 16$  mmol/mol] on MDI) were followed for  $4.1 \pm 3.6$  yrs. CSII use was associated with lower GV (HbA1c SD: CSII vs. MDI  $0.5 \pm 0.41\%$  [ $6 \pm 6$  mmol/mol] vs.  $0.7 \pm 0.7\%$  [ $9 \pm 8$  mmol/mol] and CV: CSII vs. MDI  $6.7 \pm 4.6\%$  [ $10 \pm 10$  mmol/mol] vs.  $9.3 \pm 7.3\%$  [ $14 \pm 13$  mmol/mol], both  $P < 0.001$ . Fifty-six adults (73% female, age  $36 \pm 13$  yrs,  $16 \pm 13$  yrs diabetes, HbA1c  $7.8 \pm 0.8\%$  [ $62 \pm 9$  mmol/mol] transitioned from MDI to CSII. Mean HbA1c fell by 0.4%. GV from one-year post-CSII commencement decreased significantly, HbA1c SD pre vs. post-CSII  $0.7 \pm 0.5\%$  [ $8 \pm 5$  mmol/mol] vs.  $0.4 \pm 0.4\%$  [ $5 \pm 4$  mmol/mol];  $P < 0.001$ , and HbA1c CV  $9.2 \pm 5.5\%$  [ $13 \pm 8$  mmol/mol] vs.  $6.1 \pm 3.9\%$  [ $9 \pm 5$  mmol/mol];  $P < 0.001$ .

**Conclusions:** In clinical practice with T1DM adults relative to MDI, CSII therapy is associated with lower HbA1c GV.

## Strengths and limitations of this study

- A relatively large real-world observational study across a wide age and socioeconomic status from two tertiary hospitals allows for generalisability of results
- HbA1c GV, a simple low-cost mathematical measure, assessed using two formulae, with similar results, and in venous blood in accredited laboratories
- Analysis in those on established MDI or CSII therapy and in a subset who changed modalities, and a control group of MDI users who remained on MDI.
- Not a randomised study therefore not able to completely adjust for possible behavioural differences
- Complements and extends a prior publication by the group in which short-term GV based on interstitial fluid Continuous Glucose Monitoring (CGM) measures did not differ by insulin delivery modality.

**Keywords:** Glycaemic variability, Type 1 diabetes, Continuous subcutaneous insulin infusion, Multiple daily injection.

## INTRODUCTION

Type 1 diabetes (T1DM) is characterised by day-to-day glucose fluctuations, much more so than in Type 2 diabetes (T2DM). The Diabetes Control and Complications Trial (DCCT) established that near normal glycaemic control, reflected by HbA1c levels, substantially reduces the risk of long-term vascular and neurologic complications,(1). Short-term GV can be assessed by analysing multiple daily capillary blood glucose levels, or by continuous (interstitial fluid) glucose monitoring (CGM), and at cellular level has been demonstrated,(2, 3), to increase oxidative stress,

1  
2  
3 inflammation and epigenetic changes,(4). Longer term GV can be assessed by  
4 analysing variation in HbA1c levels over time, usually reported as HbA1c standard  
5 deviation (SD) and /or coefficient of variation (CV), and has been implicated as an  
6 independent risk factor for the development of chronic complications in people with  
7 both T1DM and T2DM,(4-7). Short and long term GV do not always correlate.  
8  
9  
10  
11  
12  
13  
14  
15  
16

17 In people with T1DM, insulin can be delivered by either multiple daily injections (MDI)  
18 or by continuous subcutaneous insulin infusion (CSII). There is emerging  
19 epidemiologic evidence that CSII use (independent of HbA1c levels) is associated with  
20 a reduction in chronic complications in both adult and paediatric age groups and with  
21 reduced cardiovascular mortality in adults with T1DM,(5, 8). Although CSII use is  
22 generally associated with lower HbA1c levels compared to MDI,(9), there are no  
23 consistent reported associations in the literature between short-term and long-term  
24 GV and insulin delivery mode. CSII without frequent real-time continuous glucose  
25 monitoring (RT-CGM) is usually associated with similar short-term GV as MDI,(10-12),  
26 including in our previous study in T1DM adults in the same setting as herein. With  
27 regard to long-term GV, there is only one published study, and that is in a paediatric  
28 setting, which demonstrated long-term GV benefit of CSII compared to MDI over a  
29 three year period,(13).  
30  
31  
32  
33  
34  
35  
36  
37  
38  
39  
40  
41  
42  
43  
44  
45  
46  
47  
48

49 The primary aim of the present study was to examine HbA1c GV in adults with T1DM  
50 treated by CSII and MDI therapies predominantly without RT-CGM use in the real-  
51 world setting, not in a clinical trial. Hence, we compared HbA1c SD and CV over years  
52 in adults with T1DM treated by CSII, to those of adults treated by MDI, and also in  
53 those changing from MDI to CSII therapy. Results were analysed with and without  
54  
55  
56  
57  
58  
59  
60

1  
2  
3 adjustment for mean HbA1c levels. As glycaemic benefit of technology may differ by  
4 user age group,(14) we also compared results in emerging adults (aged 18-26 years)  
5  
6 and more mature adults ( $\geq 26$  years).  
7  
8  
9

## 10 11 12 **MATERIALS AND METHODS**

### 13 14 **Subjects**

15  
16 We undertook a retrospective audit of clinical records of adults with T1DM attending  
17 outpatient diabetes clinics at two independent tertiary referral hospitals (Royal North  
18 Shore Hospital (RNSH), Sydney and St Vincent's Hospital (SVH), Melbourne,  
19 Australia). Data from 1995-2018 were collected. Participants were excluded if they  
20 were less than 18 years old, pregnant or breast-feeding, had less than two HbA1c  
21 results on record, or had less than one year of CSII therapy. The insulin pumps  
22 were not used with continuous real-time CGM (RT-CGM). Flash glucose monitoring  
23 became available in Australia in late 2016 and was not subsidised, and RT-CGM  
24 only became subsidised for those under 21 years of age in 2017, therefore these  
25 modalities were rarely used in our public hospital settings during the study period.  
26  
27 The study was approved by the Human Research Ethics Committees of the Northern  
28 Sydney Local Health District and St Vincent's Hospital Melbourne.  
29  
30  
31  
32  
33  
34  
35  
36  
37  
38  
39  
40  
41  
42  
43  
44  
45  
46

### 47 **Patient and Public Involvement.**

48  
49 No patient involved. As this was a retrospective audit, it was not appropriate or  
50 possible to directly involve patients or public in this work.  
51  
52  
53  
54  
55

### 56 **Data collection.**

1  
2  
3 All HbA1c results were obtained from laboratories accredited with the National  
4 Association of Testing (NATA) and the Royal College of Pathologists of Australasia  
5 (RCPA). All NATA accredited laboratories are required to participate in a  
6 standardisation program and to standardise HbA1c measurements to the International  
7 Federation of Clinical Chemistry and Laboratory Medicine (IFCC) guidelines. Patients  
8 usually had their laboratory tests performed by the same pathology provider.  
9  
10 Demographic and clinical parameters (including insulin treatment modality, chronic  
11 complication status, incidence of severe hypoglycaemia (defined as any episode of  
12 hypoglycaemia requiring assistance from another person for recovery) were obtained  
13 from the medical records. Socioeconomic status was estimated via the subject's home  
14 address postcode (zip code) via the Australian Bureau of Statistics Socio-Economic  
15 Indexes for Areas (SEIFA), 2011,(15).

### 32 33 **Glycaemic variability**

34  
35 HbA1c GV was assessed through the mean within-individual SD and CV ((SD HbA1c  
36 / mean HbA1c) x 100) of available HbA1c levels. If individuals had changed treatment  
37 modality from MDI to CSII, the initial 12 months of HbA1c assessments post-CSII  
38 initiation were excluded, (as HbA1c usually decreases significantly during this  
39 time),(16, 17).

### 48 49 **Statistical analyses**

50  
51 Data were stored in EXCEL (2010) and IBM SPSS Statistics (version 22) and Graph  
52 Pad Prism (version 6.0) were used for data analyses, including descriptive statistics,  
53 paired and independent T-tests, Chi-square tests and Pearson correlation coefficients.  
54  
55 Statistical significance was taken at  $P < 0.05$ . Results were analysed as a whole and  
56  
57  
58  
59  
60

1  
2  
3 with subgroup analyses by age (18 - < 26 years and  $\geq$  26 years) and by gender. A  
4  
5 further subgroup analysis assessed the impact of insulin modality on GV across tertiles  
6  
7 of mean HbA1c using a general linear model. Participants on established insulin  
8  
9 therapies (MDI or CSII) were analysed, as were a group of individuals analysed pre-  
10  
11 and post-insulin modality change (MDI to CSII). The participants who changed from  
12  
13 MDI to CSII were matched (by age, baseline HbA1c and years of follow up) to a  
14  
15 subgroup of adults who remained on MDI. GV was compared pre- and after 1-year  
16  
17 post-modality change in the MDI to CSII group, and pre- and post a matched duration  
18  
19 of follow-up in the group who remained on MDI. Where applicable, results were  
20  
21 analysed with adjustment by least squares method for hospital location, gender,  
22  
23 vascular complications, severe hypoglycaemia, age, diabetes duration, mean HbA1c  
24  
25 levels, number of included HbA1c measurements, time between HbA1c  
26  
27 measurements, years of follow-up, average decile of socioeconomic advantage and  
28  
29 disadvantage and decile of education and occupation.  
30  
31  
32  
33  
34  
35  
36  
37

## 38 **RESULTS**

### 39 **Subject demographics.**

40  
41  
42 Baseline clinical characteristics of 506 adults with T1DM studied over time whilst on a  
43  
44 single insulin delivery modality are shown in Table 1, with participants from both  
45  
46 hospitals merged. The group is also described based on insulin delivery mode. SVH  
47  
48 participants (n = 112) were more likely to be treated by CSII compared to the RNSH  
49  
50 participants (66 (59 %) vs. 98 (25 %);  $P < 0.001$ ) as SVH was an earlier adopter of  
51  
52 CSII into their clinical practice. SVH subjects were more likely to be female, had fewer  
53  
54 vascular complications, lower socioeconomic status, longer years of HbA1c follow-up  
55  
56 and more available HbA1c measurements compared to the RNSH participants  
57  
58  
59  
60

(Supplementary Table 1). The (merged sites, Table 1) CSII users were younger, more likely to be female (in keeping with a noted national trend,(18), and less likely to have vascular complications or a previous documented episode of severe hypoglycaemia and had a significantly lower socioeconomic status relative to the MDI group. There were no significant differences in the years of follow-up between the CSII and MDI groups, nor the number of HbA1c measurements included in the study. CSII users had a slightly shorter mean  $\pm$  SD time between HbA1c measurements compared to MDI users ( $213 \pm 173$  vs.  $249 \pm 203$ ) days respectively;  $P = 0.047$ ). There were no significant differences in mean HbA1c levels nor the number of measures evaluated over the study period between the CSII and MDI groups (HbA1c mean (SD)  $7.8 \pm 1.2$  % [ $62 \pm 13$ ] mmol/mol (n = 8 HbA1c measures) CSII, and HbA1c mean (SD)  $8.0 \pm 1.5$  % [ $64 \pm 16$ ] mmol/mol (n = 8 HbA1c measures) MDI;  $P = 0.13$ ).

**Table 1 Clinical characteristics of adults with Type 1 diabetes.**

|                                 | <b>CSII</b>     | <b>MDI</b>      | <b>P value</b>    |
|---------------------------------|-----------------|-----------------|-------------------|
| N                               | 164             | 342             |                   |
| Age (years)                     | $34 \pm 13.4$   | $39 \pm 15.8$   | <b>&lt; 0.001</b> |
| Women (n (%))                   | 106 (65)        | 148 (43)        | <b>&lt; 0.001</b> |
| Years of diabetes               | $17 \pm 12.5$   | $18 \pm 14.3$   | 0.55              |
| Years CSII therapy              | $6.0 \pm 3.6$   | N/A             | -                 |
| Vascular complications (n (%))* | 49 (30)         | 143 (42)        | <b>0.008</b>      |
| Severe hypoglycaemia (n (%))†   | 14 (14)         | 70 (21)         | <b>0.045</b>      |
| Socioeconomic status (decile):  |                 |                 |                   |
| Advantage / Disadvantage        |                 |                 |                   |
| Education & occupation          | $8 \pm 2.3$     | $9 \pm 1.9$     | <b>0.005</b>      |
|                                 | $8 \pm 2.4$     | $9 \pm 1.9$     | <b>&lt; 0.001</b> |
| Years follow-up                 | $4.1 \pm 2.7$   | $4.1 \pm 4.0$   | 0.90              |
| HbA1c measures (n)              | $8 \pm 7$       | $8 \pm 8$       | 0.96              |
| Time between HbA1c (days)       | $213 \pm 173$   | $249 \pm 203$   | <b>0.047</b>      |
| Mean HbA1c                      |                 |                 |                   |
| %                               | $7.8 \pm 1.2$   | $8.0 \pm 1.5$   | 0.13              |
| [mmol/mol]                      | [ $62 \pm 13$ ] | [ $64 \pm 16$ ] |                   |



1  
2  
3 Data are mean  $\pm$  standard deviation, or n (percentage). \* Microvascular and/or  
4  
5 macrovascular complications. † Any episode of severe hypoglycaemia recorded in  
6  
7 the medical record.  
8  
9

### 15 **Lower HbA1c GV in CSII users.**

16  
17 CSII-users had significantly lower long-term variability in HbA1c as reflected by both  
18  
19 HbA1c SD and CV measures (Fig. 1). The difference remains statistically significant  
20  
21 after adjustment (least squares) for gender, hospital location, chronic complication  
22  
23 status, severe hypoglycaemia, baseline HbA1c levels, years of follow-up, number of  
24  
25 HbA1c measures, time between HbA1c tests, diabetes duration, socioeconomic status  
26  
27 and age (both  $P = 0.003$ ). In order to account for possible differences in glycaemic  
28  
29 control by hospital location, insulin modality treatments were compared separately at  
30  
31 the two sites and similar significantly lower GV was observed in CSII (vs. MDI) users  
32  
33 (Supplemental Figure 1). GV was also analysed by gender, and similarly lower HbA1c  
34  
35 SD and CV was observed in CSII compared to MDI participants in both men and  
36  
37 women. HbA1c SD in women ( $(0.6 \pm 0.5 \% [7 \pm 6] \text{ mmol/mol})$  CSII,  $(0.8 \pm 0.7 \% [9 \pm$   
38  
39  $8] \text{ mmol/mol})$  MDI,  $P = 0.005$ ) and in men ( $(0.4 \pm 0.3 \% [5 \pm 3] \text{ mmol/mol})$  CSII,  $(0.8 \pm$   
40  
41  $0.7 \% [9 \pm 8] \text{ mmol/mol})$  MDI,  $P = 0.002$ ). HbA1c CV in women ( $(7 \pm 5 \% [11 \pm 12]$   
42  
43  $\text{ mmol/mol})$  CSII,  $(9 \pm 8 \% [14 \pm 12] \text{ mmol/mol})$  MDI,  $P = 0.02$ ) and in men ( $(6 \pm 3 \% [$   
44  
45  $8 \pm 4] \text{ mmol/mol})$  CSII,  $(9 \pm 7 \% [15 \pm 13] \text{ mmol/mol})$  MDI,  $P = 0.002$ ).  
46  
47  
48  
49  
50  
51  
52  
53  
54

### 55 **Similar pattern of HbA1c variability in adults with T1DM by age group and insulin** 56 57 **treatment modality.** 58 59 60

Analysis by pre-determined age-subgroups (18 - < 26 years and  $\geq$  26 years) demonstrated that mean HbA1c was lower in the older CSII vs. older MDI users: ( $7.6 \pm 1.1$  % [ $59 \pm 12$ ] mmol/mol) CSII and  $7.9 \pm 1.4$  % [ $62 \pm 16$ ] mmol/mol) MDI;  $P = 0.034$ ), although there was no statistically significant difference in the 18 - < 26 year old group: (CSII vs. MDI;  $8.3 \pm 1.3$  % [ $66 \pm 14$ ] mmol/mol) vs.  $8.5 \pm 1.6$  % [ $68 \pm 18$ ] mmol/mol) (Supplementary Table 2). Furthermore, there were significantly lower HbA1c SD and CV over follow-up amongst both age groups treated with CSII versus those treated with MDI (Figure 2).

#### **HbA1c variability lower in CSII users across all tertiles of mean HbA1c mean.**

HbA1c GV was assessed by tertile of mean HbA1c (tertile 1 HbA1c  $\leq$  7.2% [ $55$  mmol/mol], tertile 2 HbA1c  $\leq$  8.3% [ $67$  mmol/mol], tertile 3 HbA1c  $\leq$  15.0% [ $140$  mmol/mol]) (Table 2). HbA1c CV was significantly lower in CSII vs. MDI users at any tertile of mean HbA1c, whereas HbA1c SD was lower in CSII users only in tertiles 2 and 3. There was no interaction between HbA1c SD and CV and insulin modality at any tertile of mean HbA1c ( $P = 0.28$  and  $P = 0.65$  for SD and CV respectively).

**Table 2 HbA1c GV by tertile of mean HbA1c.**

|          | <b>Tertile</b> | <b>CSII</b>   | <b>MDI</b>    | <b>P value</b> |
|----------|----------------|---------------|---------------|----------------|
| HbA1c SD | 1              | 0.4 $\pm$ 0.2 | 0.5 $\pm$ 0.4 | 0.99           |
|          | 2              | 0.5 $\pm$ 0.4 | 0.6 $\pm$ 0.5 | 0.99           |
|          | 3              | 0.8 $\pm$ 0.5 | 1.1 $\pm$ 0.9 | <b>0.008</b>   |
| HbA1c CV | 1              | 5.3 $\pm$ 3.1 | 7.5 $\pm$ 5.5 | <b>0.001</b>   |
|          | 2              | 6.5 $\pm$ 4.8 | 8.3 $\pm$ 6.5 | <b>0.04</b>    |

|   |         |          |              |
|---|---------|----------|--------------|
| 3 | 8.6±5.4 | 11.7±8.7 | <b>0.007</b> |
|---|---------|----------|--------------|

Data are mean ± standard deviation

### Lower HbA1c GV in adults changing from MDI to CSII.

Fifty-six adults chose to change their insulin delivery modality from MDI to CSII. These individuals had a mean ± SD age of 36 ± 14 years (35 ± 12 for women and 40 ± 17 for men), diabetes duration of 16 ± 13 years and 73% were female. The observation period included 4.3 ± 3.5 years on MDI and 4.6 ± 4.7 years on CSII after excluding the initial 12 months on CSII (P = 0.56), during which the mean HbA1c fell significantly. There was a similar, significantly greater number of HbA1c measurements used to determine GV whilst on CSII compared to MDI; mean ± SD (n = 10 ± 8 and n = 9 ± 7 respectively; P = 0.002), and a shorter duration between HbA1c measurements whilst on CSII compared to MDI (215 ± 158 and 336 ± 501 days respectively; P < 0.001). HbA1c levels significantly decreased following the switch to CSII, including after excluding the first 12 months of HbA1c following modality change, mean ± SD (7.8 ± 0.8 % [62 ± 9] mmol/mol) MDI vs. (7.4 ± 0.9 % [57 ± 10] mmol/mol) CSII; P < 0.001) (Fig. 3 a). In addition, CSII use lowered HbA1c variability, with CSII commencement decreasing both HbA1c SD (0.7 ± 0.5 % [8 ± 5] mmol/mol) MDI vs. 0.4 ± 0.4 % [5 ± 4] mmol/mol) CSII; P < 0.001) and HbA1c CV (9.2 ± 5.5 % [13 ± 8] mmol/mol) MDI vs. (6.1 ± 3.9 % [9 ± 5] mmol/mol) CSII; P = 0.004) (Fig. 3 b, c). There were no statistically significant correlations between the improvement in HbA1c SD or CV with baseline variables such as age and diabetes duration (data not shown). The change in HbA1c,

HbA1c SD and CV was analysed by gender and there were similar improvements in both men and women (Supplementary Table 3)

The 56 adults who changed from MDI to CSII were matched (by age, baseline HbA1c and duration of follow-up) to 56 adults who remained on MDI (Table 3). There were no statistically significant differences in baseline HbA1c, age, years of follow-up nor time between HbA1c measurements. Individuals who changed to CSII had more HbA1c values following the modality change, compared to those who remained on MDI (Post CSII  $n = 10 \pm 8$  vs. Time 2 remained on MDI  $n = 8 \pm 6$ ;  $P = 0.048$ ). In contrast to the adults who changed from MDI to CSII, the adults who remained on MDI did not significantly improve mean, standard deviation or coefficient of variation HbA1c.

**Table 3. Glycaemic variability in individuals changing from MDI to CSII compared to matched individuals remaining on MDI**

|                                | MDI to CSII          |                    |                  | Remained on MDI      |                    |           |
|--------------------------------|----------------------|--------------------|------------------|----------------------|--------------------|-----------|
|                                | Pre CSII             | Post CSII          | P value*         | Time 1               | Time 2             | P value** |
| N                              | 56                   |                    |                  | 56                   |                    |           |
| Age (years)                    | 36±13.5              |                    |                  | 38±15.7              |                    |           |
| Baseline HbA1c %<br>[mmol/mol] | 7.9±1.4<br>[63±15.7] |                    |                  | 7.9±1.5<br>[63±16.3] |                    |           |
| Study follow-up (years)        | 10.0±5.9             |                    |                  | 9.4±6.5              |                    |           |
| HbA1c measurements (n)         | 9±7                  | 10±8               | <b>0.002</b>     | 8±8                  | 8±6                | 1.00      |
| Time between HbA1c (days)      | 336±501              | 215±158            | <b>&lt;0.001</b> | 281±206              | 238±166            | 0.18      |
| Mean HbA1c %<br>[mmol/mol]     | 7.8±0.8<br>[62±9]    | 7.4±0.9<br>[57±10] | <b>&lt;0.001</b> | 7.7±1.1<br>[61±12]   | 7.7±1.2<br>[61±13] | 0.64      |
| HbA1c SD %<br>[mmol/mol]       | 0.7±0.5<br>[8±5]     | 0.4±0.4<br>[5±4]   | <b>&lt;0.001</b> | 0.6±0.5<br>[7±5]     | 0.5±0.3<br>[5±3]   | 0.10      |

|            |         |         |              |         |         |      |
|------------|---------|---------|--------------|---------|---------|------|
| HbA1c CV%  |         |         |              |         |         |      |
| %          | 9.2±5.6 | 6.1±3.9 | <b>0.004</b> | 7.8±5.2 | 6.4±3.5 | 0.12 |
| [mmol/mol] | [13±8]  | [9±5]   |              | [11±7]  | [9±5]   |      |

Data are mean ± standard deviation. \*Pre-CSII (on MDI) vs. Post-CSII \*\*Remains on MDI time 1 vs. time 2.

## DISCUSSION

In this retrospective audit of 506 adults with T1DM from two independent Australian tertiary referral diabetes centres, we report the novel finding that CSII therapy was associated with lower long-term (HbA1c) glycaemic variability than MDI therapy, despite similar mean HbA1c levels across the two modalities. Participants treated by CSII (without regular RT-CGM, low glucose suspend, predictive low glucose suspend or closed loop functions and without regular flash glucose monitoring) had significantly lower HbA1c variability reflected by both SD and CV measures. GV amongst CSII users remained significantly lower after adjustment for age, gender, diabetes duration, hospital location, socioeconomic status, chronic complication status, severe hypoglycaemia, baseline HbA1c levels, years of follow up, number of HbA1c measures and time between HbA1c measures. The groups of emerging and more mature adults showed similar HbA1c GV responses, as did males and females. The impact of CSII on HbA1c CV was consistent across all tertiles of mean HbA1c. Similar statistically significant reductions in both measures of HbA1c GV were seen with 56 patients who changed from MDI to CSII therapy, whilst MDI users who remained on MDI for a similar follow-up time did not significantly change their HbA1c GV.

Glycaemic variability has been identified as an independent risk factor for the chronic complications of diabetes,(6, 7) and in a large Swedish diabetes registry based

1  
2  
3 epidemiologic study CSII use was independently associated with a significantly lower  
4 risk of cardiovascular complications and death,(5). This finding may at least partly  
5 relate to GV, and fluctuations between hyper- and hypoglycaemia inducing  
6 inflammation and oxidative stress and epigenetic changes,(2, 4). We speculate that  
7 lower HbA1c variability, as associated with CSII use in our study, may underpin or at  
8 least contribute to the observed reduced chronic complication and death rates  
9 amongst CSII users,(5, 6, 8, 19). HbA1c variability has been implicated in the  
10 development of microvascular complications in T1DM (20), although the associations  
11 with retinopathy have not been as consistent reported as for nephropathy (6, 21-25).  
12 Only one study has found an independent association of HbA1c GV with  
13 cardiovascular events in T1DM (26). There have been no studies which have reported  
14 an association with increased HbA1c GV and mortality risk, although a number of  
15 groups have found such an association in Type 2 Diabetes (27-29).

16  
17  
18  
19  
20  
21  
22  
23  
24  
25  
26  
27  
28  
29  
30  
31  
32  
33  
34  
35  
36 There may be divergent effects of insulin treatment modality on measures of short-  
37 term (blood or interstitial fluid glucose level based) and long-term (HbA1c) glucose  
38 variability. We have previously demonstrated in 119 adult individuals with T1DM (77  
39 MDI and 42 CSII users) no statistically significant difference in any of 12 accepted  
40 measures of short-term glucose variability over 48 hours when analysed by masked  
41 CGM,(30). Unfortunately, due to the costly nature of CGM in Australia at the time of  
42 the study, when it was predominantly self-funded, only a very small subset of patients  
43 used episodic RT-CGM and usually less than the 70% of time described as needed  
44 to improve glycaemia(31). These negative results are comparable to other studies  
45 assessing short-term (CGM) glucose variability in CSII users,(8, 12, 32) all of which  
46 assessed GV over a maximum of three days. Recent consensus guidelines have  
47  
48  
49  
50  
51  
52  
53  
54  
55  
56  
57  
58  
59  
60

1  
2  
3 recommended that CGM should occur for fourteen days to accurately assess glucose  
4 profile (31), and therefore the inconsistencies in GV benefit may reflect inadequate  
5 CGM data. Furthermore, improvements in short-term GV with CSII may be impacted  
6  
7  
8  
9  
10 by deterioration in HbA1c overtime (32), highlighting the importance of assessing long-  
11  
12  
13 term GV. Even in studies in which HbA1c levels were significantly improved by CSII  
14  
15 or CSII with RT-CGM, short-term GV did not improve in all participants,(14, 33). More  
16  
17 recent studies, including those achieving tight glycaemic control,(34), or using RT-  
18  
19 CGM and insulin pumps with low-glucose suspend functions,(35), overnight closed  
20  
21 loop insulin delivery,(36) or hybrid closed loop CSII,(37) have demonstrated improved  
22  
23 short-term glucose variability. The benefit of RT-CGM on short-term GV in the  
24  
25 absence of CSII therapy has been demonstrated in the DIAMOND and GOLD trials  
26  
27 (38, 39) which may be a more cost-effective therapeutic option. However, none of  
28  
29 these studies have reported HbA1c GV change. We anticipate that technological  
30  
31 advances in pumps, sensors and control algorithms will continue to reduce short-term  
32  
33 GV, and also long-term GV, in both adults and children with T1DM. It is important to  
34  
35 consider whether study participants are in clinical trials, with their inherent selection  
36  
37 biases and often additional participant support, or in clinical practice (as herein).  
38  
39  
40  
41  
42  
43  
44

45 **Strengths and limitations.** This is a real-world study, rather than a clinical trial with  
46  
47 potential for selection bias and the Hawthorne (observer) effect,(40). We assessed  
48  
49 relatively large numbers of adults with T1DM from two independent tertiary hospitals  
50  
51 and did so over a relatively long follow-up period with good numbers of HbA1c  
52  
53 measures from accredited pathology services in both CSII and MDI users, and  
54  
55 fortunately with similar mean HbA1c in both groups. We report both HbA1c CV and  
56  
57 SD and not unexpectedly (given the mathematical derivation of SD from CV), find  
58  
59  
60

1  
2  
3 similar results with both measures. The study is strengthened by the analysis of GV  
4 over a wide adult age range, as well as by pre-established age groups and by  
5  
6 consideration of gender. We assessed the impact of GV amongst tertiles of mean  
7  
8 HbA1c, and in contrast to previous studies (10), found that the impact of insulin  
9  
10 modality on HbA1c CV persisted across varying levels of glycaemic control. As well  
11  
12 as a longitudinal observational study there was also an observation of a group  
13  
14 changing from MDI to CSII therapy, and comparison to a matched group who  
15  
16 remained on MDI. There was a similar number of HbA1c measurements included in  
17  
18 the MDI and CSII groups over a long period of follow up (four years in established  
19  
20 users, and 10 years in those who changed from MDI to CSII). HbA1c GV is a low cost  
21  
22 measure that could be calculated from routine clinical care data (of HbA1c levels),  
23  
24 hence is readily applicable to clinical practice (particularly in the era of electronic  
25  
26 medical records), and clinical trials. Study limitations are that this clinical audit does  
27  
28 not include many patients attending private practices, except for a small subset of the  
29  
30 SVH patients who attended a bulk-billing (no cost to patients) private practice on the  
31  
32 public hospital grounds, though in Australia CSII therapy is more commonly provided  
33  
34 in public hospitals than in private practice and in order to obtain their insulin pump  
35  
36 most CSII users have private health insurance,(41). We acknowledge that there may  
37  
38 be treatment differences between the two hospital sites and the bias toward CSII use  
39  
40 in the SVH site (due to their interest in and early provision of CSII services in Australia)  
41  
42 may impact results. We addressed this by analysing CSII and MDI users by hospital  
43  
44 location and found similarly lower GV in the CSII groups. HbA1c measures were  
45  
46 performed in different laboratories and likely by different methodologies, though all  
47  
48 laboratories were NATA accredited and participants usually attended the same  
49  
50 pathology provider. Given the observational nature of the study, we are unable to  
51  
52  
53  
54  
55  
56  
57  
58  
59  
60



1  
2  
3 account for all differences between the MDI and CSII groups, including treatment  
4 adherence, motivation and health literacy. We note that the time interval between  
5 HbA1c measures is shorter for CSII than MDI (mean difference of 36 days) and this  
6 may reflect behavioural differences or more healthcare involvement. However, time  
7 interval and number of HbA1c measures were statistically adjusted for in the data  
8 analyses. We did not record patient diabetes education provided to both groups,  
9 however all individuals attended clinics with access to diabetes educators, dieticians  
10 and clinicians, that were free of charge to them and usually at the same clinic visit.  
11 We acknowledge that more time may have been spent with CSII users for initial CSII  
12 education,(18), however the initial 12 months of HbA1c data following CSII  
13 commencement, when greater education time was likely provided, was excluded from  
14 the study. Therefore, the observed prolonged benefit on glycaemic variability is less  
15 likely to be due to initial education. Other groups have examined the impact of CSII  
16 therapy compared to MDI on glycaemic control when equal education time is provided  
17 (16, 42). The results have not been consistent, and a recent RCT failed to show  
18 clinical and economic benefit of CSII (42). Neither study measured long-term GV.  
19 We acknowledge that figures related to severe hypoglycaemia event rates, retrieved  
20 from medical records, may not be accurate.

21  
22  
23  
24  
25  
26  
27  
28  
29  
30  
31  
32  
33  
34  
35  
36  
37  
38  
39  
40  
41  
42  
43  
44  
45  
46  
47 Future research directions include confirmatory studies in both adult and paediatric  
48 groups with T1DM, linkage of both short and long-term measures of glucose variability  
49 to hard clinical events and the effects of pumps with RT-CGM, closed loop insulin  
50 delivery systems, bihormonal pumps and insulin adjunct therapies (such as SGLT2  
51 inhibitors, metformin and incretin modulating drugs) on glycaemic variability.  
52  
53  
54  
55  
56  
57  
58  
59  
60  
61  
62  
63  
64  
65  
66  
67  
68  
69  
70  
71  
72  
73  
74  
75  
76  
77  
78  
79  
80  
81  
82  
83  
84  
85  
86  
87  
88  
89  
90  
91  
92  
93  
94  
95  
96  
97  
98  
99  
100  
Mechanistic studies exploring the clinical, cellular and molecular effects of glycaemic

1  
2  
3 variability are also of relevance. It is imperative that further research addresses the  
4  
5 cost benefits of CSII therapy and of RT-CGM therapy to facilitate equitable technology  
6  
7 access. Analyses of long-term outcome data to determine recommended HbA1c GV  
8  
9 targets are also desirable.  
10  
11  
12  
13

14  
15 In summary, this study has shown that CSII use is associated with lower HbA1c  
16  
17 glycaemic variability in adults with T1DM. HbA1c variability, a simple and low cost  
18  
19 measure, thought to modulate chronic diabetes complication risk, should be a routine  
20  
21 tool to assess glycaemic control in clinical practice and in clinical research and trials.  
22  
23  
24  
25

## 26 **ACKNOWLEDGMENTS**

27  
28 Authors thank all patients, clinicians, scientists and administration team members in  
29  
30 the participating clinics.  
31  
32  
33  
34

## 35 **AUTHOR CONTRIBUTIONS**

36  
37 ES researched the RNS data, analysed the data and wrote the manuscript. RM  
38  
39 contributed to RNS data collection and reviewed the manuscript. ASJ facilitated SVH  
40  
41 data collection and reviewed the manuscript. DC contributed to SVH data collection.  
42  
43 AH reviewed the manuscript. DNO contributed to data generation and collection at  
44  
45 SVH and reviewed the manuscript. GF contributed to data generation and collection  
46  
47 at RNSH and reviewed the manuscript. AJJ contributed to study design, data  
48  
49 generation and collection at SVH and contributed to writing of the manuscript. All  
50  
51 authors contributed to data interpretation. AJJ is the guarantor.  
52  
53  
54  
55  
56  
57

## 58 **FUNDING STATEMENT**

1  
2  
3 This research received no specific grant from any funding agency in the public,  
4 commercial or not-for-profit sectors.  
5  
6  
7  
8  
9

## 10 **COMPETING INTERESTS**

11  
12 Funding (scholarships for ES) were provided by NHMRC (Australia), JDRF Australia,  
13 the University of Sydney, and the Royal Australasian College of Physicians Vincent  
14 Fairfax Award. AJJ was supported by a NHMRC Practitioner Fellowship and funding  
15 from the NHMRC Clinical Trials Centre and is a Sydney Medical Foundation School  
16 Fellow. AAH is supported by a career development award from the JDRF Australia  
17 T1D Clinical Research Network.  
18  
19  
20  
21  
22  
23  
24  
25  
26  
27

## 28 **DATA SHARING**

29  
30 This study was a retrospective audit of two tertiary hospital medical records. We do  
31 not have ethics approval to share this data.  
32  
33  
34  
35  
36  
37

## 38 **REFERENCES**

- 39  
40  
41  
42 1. The effect of intensive treatment of diabetes on the development and  
43 progression of long-term complications in insulin-dependent diabetes mellitus. The  
44 Diabetes Control and Complications Trial Research Group. *The New England journal*  
45 *of medicine*. 1993;329(14):977-86.  
46  
47  
48  
49  
50  
51 2. Piconi L, Quagliaro L, Assaloni R, et al. Constant and intermittent high glucose  
52 enhances endothelial cell apoptosis through mitochondrial superoxide overproduction.  
53 *Diabetes/metabolism research and reviews*. 2006;22(3):198-203.  
54  
55  
56  
57  
58  
59  
60

- 1  
2  
3 3. Polhill TS, Saad S, Poronnik P, et al. Short-term peaks in glucose promote renal  
4 fibrogenesis independently of total glucose exposure. *American journal of physiology*  
5 *Renal physiology*. 2004;287(2):F268-73.  
6  
7
- 8  
9  
10 4. Ceriello A, Esposito K, Piconi L, et al. Oscillating glucose is more deleterious to  
11 endothelial function and oxidative stress than mean glucose in normal and type 2  
12 diabetic patients. *Diabetes*. 2008;57(5):1349-54.  
13  
14
- 15  
16  
17 5. Steineck I, Cederholm J, Eliasson B, et al. Insulin pump therapy, multiple daily  
18 injections, and cardiovascular mortality in 18,168 people with type 1 diabetes:  
19 observational study. *Bmj*. 2015;350:h3234.  
20  
21
- 22  
23  
24 6. Kilpatrick ES, Rigby AS, Atkin SL. A1C variability and the risk of microvascular  
25 complications in type 1 diabetes: data from the Diabetes Control and Complications  
26 Trial. *Diabetes care*. 2008;31(11):2198-202.  
27  
28
- 29  
30  
31 7. Virk SA, Donaghue KC, Cho YH, et al. Association Between HbA1c Variability  
32 and Risk of Microvascular Complications in Adolescents With Type 1 Diabetes. *The*  
33 *Journal of clinical endocrinology and metabolism*. 2016;101(9):3257-63.  
34  
35
- 36  
37  
38 8. Zabeen B, Craig ME, Virk SA, et al. Insulin Pump Therapy Is Associated with  
39 Lower Rates of Retinopathy and Peripheral Nerve Abnormality. *PloS one*.  
40 2016;11(4):e0153033.  
41  
42
- 43  
44  
45 9. Misso ML, Egberts KJ, Page M, et al. Continuous subcutaneous insulin infusion  
46 (CSII) versus multiple insulin injections for type 1 diabetes mellitus. *The Cochrane*  
47 *database of systematic reviews*. 2010(1):CD005103.  
48  
49
- 50  
51  
52 10. Lepore G, Corsi A, Dodesini AR, et al. Continuous subcutaneous insulin  
53 infusion is better than multiple daily insulin injections in reducing glucose variability  
54 only in type 1 diabetes with good metabolic control. *Diabetes care*. 2010;33(6):e81.  
55  
56  
57  
58  
59  
60

- 1  
2  
3 11. Simon B, Treat V, Marco C, et al. A comparison of glycaemic variability in CSII  
4 vs. MDI treated type 1 diabetic patients using CGMS. *International journal of clinical*  
5  
6  
7  
8 *practice*. 2008;62(12):1858-63.  
9
- 10 12. Alemzadeh R, Palma-Sisto P, Parton EA, et al. Continuous subcutaneous  
11  
12  
13  
14  
15  
16  
17  
18  
19  
20  
21  
22  
23  
24  
25  
26  
27  
28  
29  
30  
31  
32  
33  
34  
35  
36  
37  
38  
39  
40  
41  
42  
43  
44  
45  
46  
47  
48  
49  
50  
51  
52  
53  
54  
55  
56  
57  
58  
59  
60
12. Alemzadeh R, Palma-Sisto P, Parton EA, et al. Continuous subcutaneous insulin infusion and multiple dose of insulin regimen display similar patterns of blood glucose excursions in pediatric type 1 diabetes. *Diabetes technology & therapeutics*. 2005;7(4):587-96.
13. Fendler W, Baranowska AI, Mianowska B, et al. Three-year comparison of subcutaneous insulin pump treatment with multi-daily injections on HbA1c, its variability and hospital burden of children with type 1 diabetes. *Acta diabetologica*. 2012;49(5):363-70.
14. Jenkins AJ, Krishnamurthy B, Best JD, et al. Evaluation of an algorithm to guide patients with type 1 diabetes treated with continuous subcutaneous insulin infusion on how to respond to real-time continuous glucose levels: a randomized controlled trial. *Diabetes care*. 2010;33(6):1242-8.
15. Census of Population and Housing: socio-economic indexes for areas (SEIFA) Australia [Internet]. 2011 [cited 1/11/17]. Available from: <http://www.abs.gov.au/AUSSTATS/abs@.nsf/DetailsPage/2039.02006>.
16. Cohen ND, Hong ES, Van Drie C, et al. Long-term metabolic effects of continuous subcutaneous insulin infusion therapy in type 1 diabetes. *Diabetes technology & therapeutics*. 2013;15(7):544-9.
17. Calandro D, Januszewski A, Cuper K, et al. Substantial and sustained HbA1c reductions in Australian insulin pump services for adults with type 1 diabetes. *Madridge J Dia*. 2016;1(1):23-39.

- 1  
2  
3 18. Xu S, Alexander K, Bryant W, et al. Healthcare professional requirements for  
4 the care of adult diabetes patients managed with insulin pumps in Australia. *Intern*  
5  
6 *Med J.* 2015;45(1):86-93.  
7  
8  
9
- 10 19. Rosenlund S, Hansen TW, Andersen S, et al. Effect of 4 years subcutaneous  
11 insulin infusion treatment on albuminuria, kidney function and HbA1c compared with  
12 multiple daily injections: a longitudinal follow-up study. *Diabetic medicine : a journal of*  
13 *the British Diabetic Association.* 2015;32(11):1445-52.  
14  
15  
16  
17  
18
- 19 20. Gorst C, Kwok CS, Aslam S, et al. Long-term Glycemic Variability and Risk of  
20 Adverse Outcomes: A Systematic Review and Meta-analysis. *Diabetes care.*  
21  
22 2015;38(12):2354-69.  
23  
24  
25
- 26 21. Nazim J, Fendler W, Starzyk J. Metabolic control and its variability are major  
27 risk factors for microalbuminuria in children with type 1 diabetes. *Endokrynologia*  
28 *Polska.* 2014;65(2):83-9.  
29  
30  
31  
32
- 33 22. Hermann JM, Hammes HP, Rami-Merhar B, et al. HbA1c variability as an  
34 independent risk factor for diabetic retinopathy in type 1 diabetes: a German/Austrian  
35 multicenter analysis on 35,891 patients. *PloS one.* 2014;9(3):e91137.  
36  
37  
38  
39
- 40 23. Marcovecchio ML, Dalton RN, Chiarelli F, et al. A1C variability as an  
41 independent risk factor for microalbuminuria in young people with type 1 diabetes.  
42 *Diabetes care.* 2011;34(4):1011-3.  
43  
44  
45  
46
- 47 24. Raman S, Dai H, DeLurgio SA, et al. High hemoglobin A1c variability is  
48 associated with early risk of microalbuminuria in children with T1D. *Pediatric diabetes.*  
49 2016;17(6):398-406.  
50  
51  
52  
53
- 54 25. Hietala K, Waden J, Forsblom C, et al. HbA1c variability is associated with an  
55 increased risk of retinopathy requiring laser treatment in type 1 diabetes. *Diabetologia.*  
56 2013;56(4):737-45.  
57  
58  
59  
60

- 1  
2  
3 26. Waden J, Forsblom C, Thorn LM, et al. A1C variability predicts incident  
4 cardiovascular events, microalbuminuria, and overt diabetic nephropathy in patients  
5 with type 1 diabetes. *Diabetes*. 2009;58(11):2649-55.  
6  
7  
8  
9  
10 27. Forbes A, Murrells T, Mulnier H, et al. Mean HbA1c, HbA1c variability, and  
11 mortality in people with diabetes aged 70 years and older: a retrospective cohort study.  
12 *Lancet Diabetes Endocrinol*. 2018.  
13  
14  
15  
16 28. Critchley JA, Carey IM, Harris T, et al. Variability in Glycated Hemoglobin and  
17 Risk of Poor Outcomes Among People With Type 2 Diabetes in a Large Primary Care  
18 Cohort Study. *Diabetes care*. 2019.  
19  
20  
21  
22  
23 29. Cardoso CRL, Leite NC, Moram CBM, et al. Long-term visit-to-visit glycemic  
24 variability as predictor of micro- and macrovascular complications in patients with type  
25 2 diabetes: The Rio de Janeiro Type 2 Diabetes Cohort Study. *Cardiovasc Diabetol*.  
26 2018;17(1):33.  
27  
28  
29  
30  
31  
32 30. Scott ES, McGrath RT, Januszewski AS, et al. Short-term glucose variability in  
33 adults with Type 1 diabetes does not differ between insulin pump and multiple daily  
34 injection users - a masked continuous glucose monitoring study in clinical practice.  
35 *Diabetes Metab*. 2018.  
36  
37  
38  
39  
40  
41 31. Danne T, Nimri R, Battelino T, et al. International Consensus on Use of  
42 Continuous Glucose Monitoring. *Diabetes care*. 2017;40(12):1631-40.  
43  
44  
45  
46 32. Harrington J, Pena AS, Wilson L, et al. Vascular function and glucose variability  
47 improve transiently following initiation of continuous subcutaneous insulin infusion in  
48 children with type 1 diabetes. *Pediatric diabetes*. 2013;14(7):504-11.  
49  
50  
51  
52 33. Buse JB, Kudva YC, Battelino T, et al. Effects of sensor-augmented pump  
53 therapy on glycemic variability in well-controlled type 1 diabetes in the STAR 3 study.  
54 *Diabetes technology & therapeutics*. 2012;14(7):644-7.  
55  
56  
57  
58  
59  
60

- 1  
2  
3 34. Soupal J, Petruzelkova L, Flekac M, et al. Comparison of Different Treatment  
4 Modalities for Type 1 Diabetes, Including Sensor-Augmented Insulin Regimens, in 52  
5 Weeks of Follow-Up: A COMISAIR Study. *Diabetes technology & therapeutics*.  
6 2016;18(9):532-8.  
7  
8  
9  
10  
11  
12 35. Rosenlund S, Hansen TW, Rossing P, et al. Effect of Sensor-Augmented Pump  
13 Treatment Versus Multiple Daily Injections on Albuminuria: A 1-Year Randomized  
14 Study. *The Journal of clinical endocrinology and metabolism*. 2015;100(11):4181-8.  
15  
16  
17  
18 36. Renard E, Farret A, Kropff J, et al. Day-and-Night Closed-Loop Glucose Control  
19 in Patients With Type 1 Diabetes Under Free-Living Conditions: Results of a Single-  
20 Arm 1-Month Experience Compared With a Previously Reported Feasibility Study of  
21 Evening and Night at Home. *Diabetes care*. 2016;39(7):1151-60.  
22  
23  
24  
25 37. Garg SK, Weinzimer SA, Tamborlane WV, et al. Glucose Outcomes with the  
26 In-Home Use of a Hybrid Closed-Loop Insulin Delivery System in Adolescents and  
27 Adults with Type 1 Diabetes. *Diabetes technology & therapeutics*. 2017;19(3):155-63.  
28  
29  
30  
31 38. Beck RW, Riddlesworth T, Ruedy K, et al. Effect of Continuous Glucose  
32 Monitoring on Glycemic Control in Adults With Type 1 Diabetes Using Insulin  
33 Injections: The DIAMOND Randomized Clinical Trial. *JAMA*. 2017;317(4):371-8.  
34  
35  
36  
37 39. Lind M, Polonsky W, Hirsch IB, et al. Continuous Glucose Monitoring vs  
38 Conventional Therapy for Glycemic Control in Adults With Type 1 Diabetes Treated  
39 With Multiple Daily Insulin Injections: The GOLD Randomized Clinical Trial. *JAMA*.  
40 2017;317(4):379-87.  
41  
42  
43  
44 40. McCambridge J, Witton J, Elbourne DR. Systematic review of the Hawthorne  
45 effect: new concepts are needed to study research participation effects. *J Clin  
46 Epidemiol*. 2014;67(3):267-77.  
47  
48  
49  
50  
51  
52  
53  
54  
55  
56  
57  
58  
59  
60



1  
2  
3 41. Insulin pump use in Australia [Internet]. 2012 [cited February 16 2017].

4  
5 Available from: <http://aihw.gov.au>.

6  
7  
8 42. Heller S, White D, Lee E, et al. A cluster randomised trial, cost-effectiveness  
9  
10 analysis and psychosocial evaluation of insulin pump therapy compared with multiple  
11  
12 injections during flexible intensive insulin therapy for type 1 diabetes: the REPOSE  
13  
14 Trial. *Health Technol Assess*. 2017;21(20):1-278.  
15  
16  
17  
18  
19  
20  
21  
22  
23  
24  
25  
26  
27  
28  
29  
30  
31  
32  
33  
34  
35  
36  
37  
38  
39  
40  
41  
42  
43  
44  
45  
46  
47  
48  
49  
50  
51  
52  
53  
54  
55  
56  
57  
58  
59  
60

## FIGURE LEGENDS

**Figure 1.** Long-term glycaemic (HbA1c) variability in 164 CSII and 342 MDI participants. Standard deviation of HbA1c over follow-up ( $0.5 \pm 0.4$  % [ $6 \pm 6$ ] mmol/mol) CSII, ( $0.7 \pm 0.7$  % [ $9 \pm 8$ ] mmol/mol) MDI) (A) and coefficient of variation (CV) of HbA1c over follow-up ( $6.7 \pm 4.6$  % [ $10 \pm 10$ ] mmol/mol) CSII, ( $9.3 \pm 7.3$  % [ $14 \pm 13$ ] mmol/mol) MDI) (B). Black bars = CSII; white bars = MDI. Graphed values are Mean +/- SEM.  $P < 0.001$ .

**Figure 2.** Long-term glycaemic variability by pre-defined age groups. Adults aged 18 - 26 y (n = 54 on CSII, n = 69 on MDI) standard deviation of HbA1c ( $0.6 \pm 0.4$  % [ $7 \pm 8$ ] mmol/mol) CSII, ( $0.9 \pm 0.6$  % [ $11 \pm 7$ ] mmol/mol) MDI;  $P = 0.001$ ) (A) and coefficient of variation HbA1c over follow-up ( $7.3 \pm 5.5$  % [ $12 \pm 16$ ] mmol/mol) CSII, ( $10.5 \pm 5.9$  % [ $16 \pm 12$ ] mmol/mol) MDI ;  $P = 0.002$ ) (B). Adults aged  $\geq 26$  y (110 CSII, 273 MDI) standard deviation of HbA1c ( $0.5 \pm 0.4$  % [ $5 \pm 4$ ] mmol/mol) CSII, ( $0.7 \pm 0.7$  % [ $9 \pm 8$ ] mmol/mol) MDI;  $P < 0.001$ ) (C) and coefficient of variation over follow-up ( $6.3 \pm 4.2$  % [ $9 \pm 5$ ] mmol/mol) CSII, ( $8.9 \pm 7.6$  % [ $14 \pm 13$ ] mmol/mol) MDI;  $P < 0.001$ ) (D). Black bars = CSII; white bars = MDI. Graphed values are mean +/- SEM.

**Figure 3.** Long-term glycaemic variability in individuals changing from MDI to CSII therapy. Fifty-six adults changed from MDI to CSII therapy over the study. Mean HbA1c over follow-up ( $P < 0.001$ ) (A), standard deviation of HbA1c ( $P < 0.001$ ) (B) and coefficient of variation of HbA1c over follow-up ( $P = 0.004$ ) (C). Black circles = MDI; white squares = CSII. Graphed values are mean pre- and post-therapy change.



Figure 1. Long-term glycaemic (HbA1c) variability in 164 CSII and 342 MDI participants. Standard deviation of HbA1c over follow-up (0.5  $\pm$  0.4 % [6  $\pm$  6] mmol/mol) CSII, (0.7  $\pm$  0.7 % [9  $\pm$  8] mmol/mol) MDI) (A) and coefficient of variation (CV) of HbA1c over follow-up (6.7  $\pm$  4.6 % [10  $\pm$  10] mmol/mol) CSII, (9.3  $\pm$  7.3 % [14  $\pm$  13] mmol/mol) MDI) (B). Black bars = CSII; white bars = MDI. Graphed values are Mean  $\pm$  SEM. P < 0.001.

66x49mm (300 x 300 DPI)

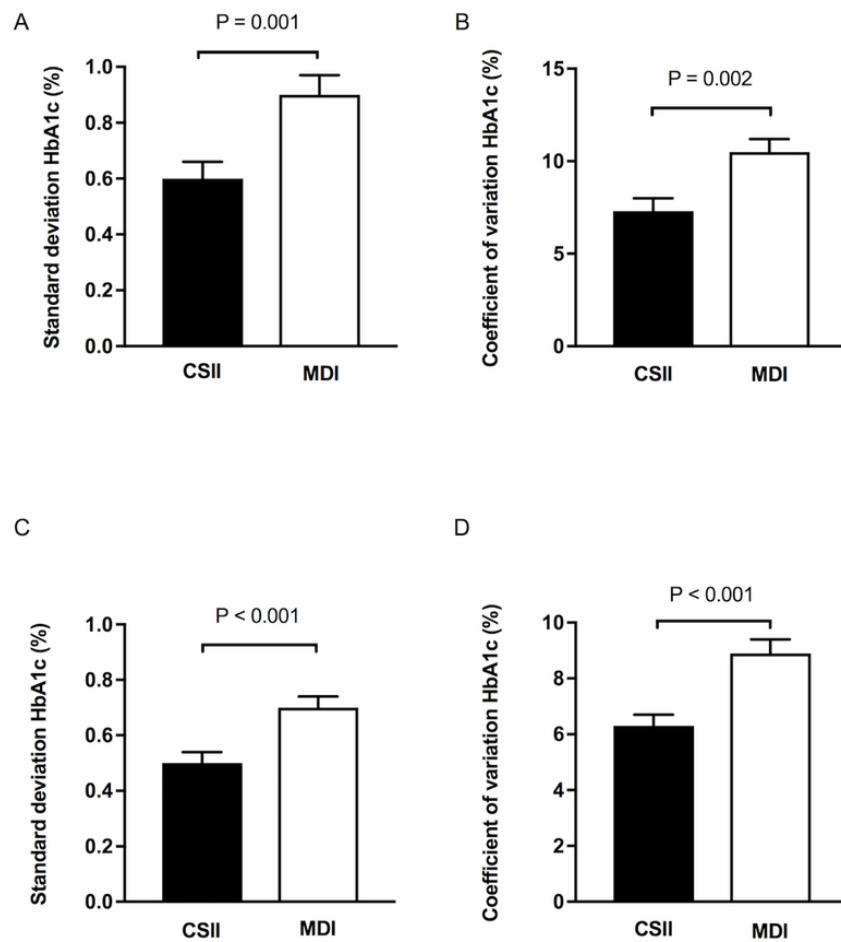

Figure 2. Long-term glycaemic variability by pre-defined age groups. Adults aged 18 - 26 y (n = 54 on CSII, n = 69 on MDI) standard deviation of HbA1c (0.6 ± 0.4 % [7 ± 8] mmol/mol) CSII, 0.9 ± 0.6 % [11 ± 7] mmol/mol) MDI; P = 0.001) (A) and coefficient of variation HbA1c over follow-up (7.3 ± 5.5 % [12 ± 16] mmol/mol) CSII, 10.5 ± 5.9 % [16 ± 12] mmol/mol) MDI ; P = 0.002) (B). Adults aged ≥ 26 y (110 CSII, 273 MDI) standard deviation of HbA1c (0.5 ± 0.4 % [5 ± 4] mmol/mol) CSII, 0.7 ± 0.7 % [9 ± 8] mmol/mol) MDI; P < 0.001) (C) and coefficient of variation over follow-up (6.3 ± 4.2 % [9 ± 5] mmol/mol) CSII, 8.9 ± 7.6 % [14 ± 13] mmol/mol) MDI; P < 0.001) (D). Black bars = CSII; white bars = MDI. Graphed values are mean ± SEM.

66x93mm (300 x 300 DPI)



Figure 3. Long-term glycaemic variability in individuals changing from MDI to CSII therapy. Fifty-six adults changed from MDI to CSII therapy over the study. Mean HbA1c over follow-up ( $P < 0.001$ ) (A), standard deviation of HbA1c ( $P < 0.001$ ) (B) and coefficient of variation of HbA1c over follow-up ( $P = 0.004$ ) (C). Black circles = MDI; white squares = CSII. Graphed values are mean pre- and post-therapy change.

125x59mm (300 x 300 DPI)

**Supplementary Table 1.** Clinical characteristics of adults with Type 1 diabetes by location.

| Location                                                   | Royal North Shore Hospital | St Vincent's Hospital | P value           |
|------------------------------------------------------------|----------------------------|-----------------------|-------------------|
| N                                                          | 394                        | 112                   |                   |
| CSII (n (%))                                               | 98 (24.9)                  | 66 (58.9)             | <b>&lt;0.001</b>  |
| Age (years)                                                | 38±16                      | 36±12                 | 0.23              |
| Women (n (%))                                              | 189 (62)                   | 65 (58)               | <b>0.049</b>      |
| Years of diabetes                                          | 17±14                      | 18±13                 | 0.47              |
| Years CSII therapy                                         | 5±4                        | 7±3                   | <b>0.026</b>      |
| Vascular complications (n (%))*                            | 161 (41)                   | 31 (30)               | <b>0.04</b>       |
| Severe hypoglycaemia (n (%))†                              | 84 (22)                    | -                     | -                 |
| Socioeconomic status (decile):<br>Advantage / Disadvantage |                            |                       |                   |
| Education & occupation                                     | 9±2                        | 7±2                   | <b>&lt; 0.001</b> |
|                                                            | 9±2                        | 7±3                   | <b>&lt; 0.001</b> |
| Years follow-up                                            | 3.0±1.9                    | 7.0±5.9               | <b>&lt; 0.001</b> |
| HbA1c measures (n)                                         | 7±4                        | 15±13                 | <b>&lt; 0.001</b> |
| Time between HbA1c (days)                                  | 238±197                    | 237±185               | 0.98              |
| Mean HbA1c                                                 |                            |                       |                   |
| %                                                          | 8.0±1.5                    | 7.7±1.5               | 0.06              |
| [mmol/mol]                                                 | [64±16]                    | [60±12]               |                   |

Data are mean ± standard deviation, or n (percentage). \* Microvascular and macrovascular complications. † Any episode of severe hypoglycaemia recorded in the medical record.

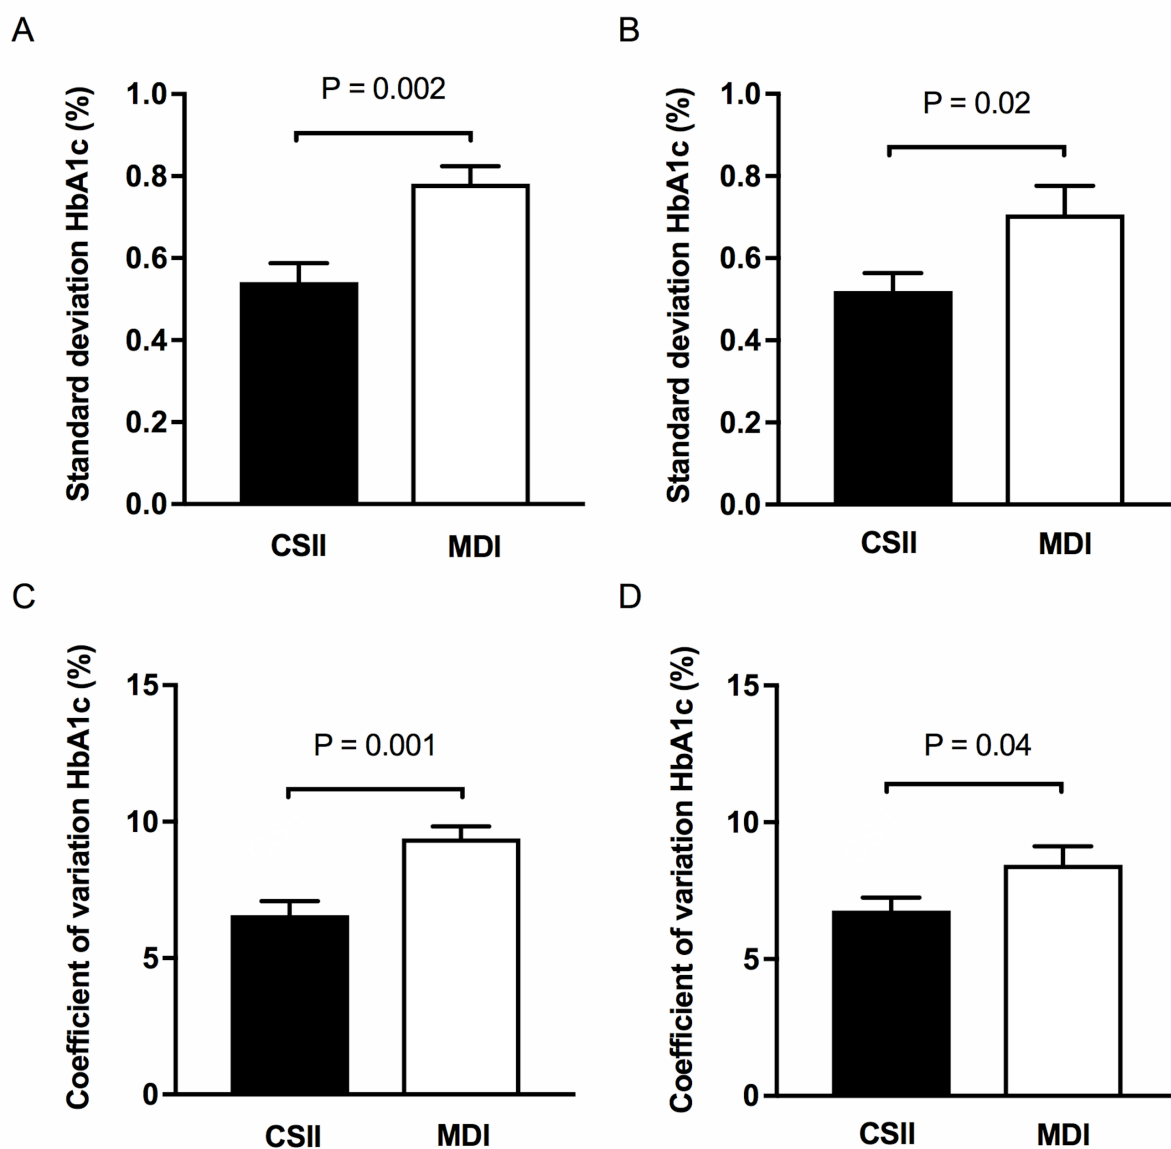

**Supplementary Figure 1.** Long-term glycaemic variability in CSII and MDI participants by hospital location. Standard deviation of HbA1c over follow-up ( $0.5 \pm 0.5$  % [ $6 \pm 7$ ] mmol/mol) CSII, ( $0.8 \pm 0.7$  % [ $9 \pm 8$ ] mmol/mol) MDI, Royal North Shore Hospital (A) and standard deviation of HbA1c ( $0.5 \pm 0.4$  % [ $6 \pm 4$ ] mmol/mol) CSII,

1  
2  
3 (0.7 ± 0.5 % [11 ± 9] mmol/mol) MDI, St Vincent's Hospital (B). Coefficient of variation  
4 of HbA1c over follow-up (6.6 ± 5.1 % [10 ± 12] mmol/mol) CSII, (9.4 ± 7.7 % [13 ± 11]  
5 mmol/mol) MDI, Royal North Shore Hospital (C) and coefficient of variation of HbA1c  
6 (6.8 ± 3.8 % [9 ± 5] mmol/mol) CSII and (8.4 ± 4.6 % [21 ± 20] mmol/mol) MDI, St  
7 Vincent's Hospital (D). Black bars = CSII; white bars = MDI. Graphed values are  
8 Mean +/- SEM.  
9  
10  
11  
12  
13  
14  
15  
16  
17  
18  
19  
20  
21  
22  
23  
24  
25  
26  
27  
28  
29  
30  
31  
32  
33  
34  
35  
36  
37  
38  
39  
40  
41  
42  
43  
44  
45  
46  
47  
48  
49  
50  
51  
52  
53  
54  
55  
56  
57  
58  
59  
60

For peer review only



**Supplementary Table 2.** Clinical characteristics of adults with Type 1 diabetes by age subgroups of 18-26 years and greater than or equal to 26 years.

|                                 | 18-26 y |         | P value     | ≥ 26 y  |          | P value          |
|---------------------------------|---------|---------|-------------|---------|----------|------------------|
|                                 | CSII    | MDI     |             | CSII    | MDI      |                  |
| N                               | 54      | 69      |             | 110     | 273      |                  |
| Age (years)                     | 20±2    | 20±2    | 0.57        | 40±11   | 44±14    | <b>0.009</b>     |
| Women (n (%))                   | 34 (63) | 30 (43) | <b>0.03</b> | 72 (65) | 118 (43) | <b>&lt;0.001</b> |
| Years of diabetes               | 9±5     | 8±6     | 0.48        | 21±13   | 20±15    | 0.56             |
| Years CSII therapy              | 6±3     | N/A     | -           | 6±4     | N/A      | -                |
| Vascular complications (n (%))* | 5 (9)   | 10 (15) | 0.35        | 44 (41) | 122 (50) | 0.12             |
| Severe hypoglycaemia (n (%))†   | 4 (10)  | 5 (10)  | 0.96        | 10 (18) | 65 (27)  | 0.17             |
| Socioeconomic status (decile):  |         |         |             |         |          |                  |
| Advantage/Disadvantage          | 9±2     | 9±2     | 0.12        | 8±3     | 9±2      | <b>&lt;0.001</b> |
| Education & occupation          | 9±2     | 9±2     | 0.41        | 8±3     | 9±2      | <b>&lt;0.001</b> |
| Study follow-up (years)         | 3±2.6   | 3.6±4.0 | 0.50        | 4.5±2.7 | 4.2±4.0  | 0.52             |
| HbA1c measurements (n)          | 7±6     | 9±10    | 0.40        | 9±8     | 8±8      | 0.43             |
| Time between HbA1c (days)       | 221±237 | 205±127 | 0.62        | 20±131  | 261±216  | <b>0.019</b>     |
| Mean HbA1c %                    | 8.3±1.3 | 8.5±1.6 | 0.52        | 7.6±1.1 | 7.9±1.4  | <b>0.034</b>     |
| [mmol/mol]                      | [66±14] | [68±18] |             | [59±12] | [62±16]  |                  |

Data are mean ± standard deviation, or n (percentage). \* Microvascular and/or macrovascular complications. † Any episode of severe hypoglycaemia recorded in the medical record.

**Supplementary Table 3.** Long-term glycaemic variability in individuals changing from MDI to CSII therapy by gender.

| Gender                     | Male (n = 15)     |                   |              | Female (n= 41)     |                    |                  |
|----------------------------|-------------------|-------------------|--------------|--------------------|--------------------|------------------|
|                            | MDI (pre)         | CSII (post)       | P value      | MDI (pre)          | CSII (post)        | P value          |
| Mean HbA1c %<br>[mmol/mol] | 7.8±0.7<br>[62±8] | 7.4±0.8<br>[57±8] | <b>0.014</b> | 7.9±0.8<br>[62±9]  | 7.3±1.0<br>[57±10] | <b>0.001</b>     |
| SD HbA1c %<br>[mmol/mol]   | 0.6±0.4<br>[7±4]  | 0.4±0.2<br>[4±2]  | <b>0.007</b> | 0.8±0.5<br>[8±5]   | 0.5±0.4<br>[5±4]   | <b>&lt;0.001</b> |
| CV HbA1c %<br>[mmol/mol]   | 7.9±4.5<br>[11±6] | 5.1±3.2<br>[7±5]  | <b>0.013</b> | 9.7±5.8<br>[14±8 ] | 6.4±4.1<br>[9±6]   | <b>0.001</b>     |

1  
2  
3  
4  
5  
6  
7  
8  
9  
10  
11  
12  
13  
14  
15  
16  
17  
18  
19  
20  
21  
22  
23  
24  
25  
26  
27  
28  
29  
30  
31  
32  
33  
34  
35  
36  
37  
38  
39  
40  
41  
42  
43  
44  
45  
46  
47  
48  
49  
50  
51  
52  
53  
54  
55  
56  
57  
58  
59  
60

For peer review only

# Reporting checklist for cohort study.

Based on the STROBE cohort guidelines.

## Instructions to authors

Complete this checklist by entering the page numbers from your manuscript where readers will find each of the items listed below.

Your article may not currently address all the items on the checklist. Please modify your text to include the missing information. If you are certain that an item does not apply, please write "n/a" and provide a short explanation.

Upload your completed checklist as an extra file when you submit to a journal.

In your methods section, say that you used the STROBE cohort reporting guidelines, and cite them as:

von Elm E, Altman DG, Egger M, Pocock SJ, Gøtzsche PC, Vandenbroucke JP. The Strengthening the Reporting of Observational Studies in Epidemiology (STROBE) Statement: guidelines for reporting observational studies.

|                           |                     |                                                                                                 | Page<br>Number |
|---------------------------|---------------------|-------------------------------------------------------------------------------------------------|----------------|
| <b>Title and abstract</b> |                     |                                                                                                 |                |
| Title                     | <a href="#">#1a</a> | Indicate the study's design with a commonly used term in the title or the abstract              | 3              |
| Abstract                  | <a href="#">#1b</a> | Provide in the abstract an informative and balanced summary of what was done and what was found | 3              |
| <b>Introduction</b>       |                     |                                                                                                 |                |
| Background / rationale    | <a href="#">#2</a>  | Explain the scientific background and rationale for the investigation being reported            | 4              |
| Objectives                | <a href="#">#3</a>  | State specific objectives, including any prespecified hypotheses                                | 5              |
| <b>Methods</b>            |                     |                                                                                                 |                |
| Study design              | <a href="#">#4</a>  | Present key elements of study design early in the paper                                         | 6              |
| Setting                   | <a href="#">#5</a>  | Describe the setting, locations, and relevant dates, including periods of                       | 6              |

|    |                      |                                                                                                |     |
|----|----------------------|------------------------------------------------------------------------------------------------|-----|
|    |                      | recruitment, exposure, follow-up, and data collection                                          |     |
| 1  |                      |                                                                                                |     |
| 2  | Eligibility criteria | <a href="#">#6a</a> Give the eligibility criteria, and the sources and methods of selection of | 6   |
| 3  |                      | participants. Describe methods of follow-up.                                                   |     |
| 4  |                      |                                                                                                |     |
| 5  |                      |                                                                                                |     |
| 6  | Eligibility criteria | <a href="#">#6b</a> For matched studies, give matching criteria and number of exposed and      | 7   |
| 7  |                      | unexposed                                                                                      |     |
| 8  |                      |                                                                                                |     |
| 9  |                      |                                                                                                |     |
| 10 | Variables            | <a href="#">#7</a> Clearly define all outcomes, exposures, predictors, potential               | 6   |
| 11 |                      | confounders, and effect modifiers. Give diagnostic criteria, if applicable                     |     |
| 12 |                      |                                                                                                |     |
| 13 |                      |                                                                                                |     |
| 14 | Data sources /       | <a href="#">#8</a> For each variable of interest give sources of data and details of methods   | 6-7 |
| 15 | measurement          | of assessment (measurement). Describe comparability of assessment                              |     |
| 16 |                      | methods if there is more than one group. Give information separately                           |     |
| 17 |                      | for for exposed and unexposed groups if applicable.                                            |     |
| 18 |                      |                                                                                                |     |
| 19 |                      |                                                                                                |     |
| 20 |                      |                                                                                                |     |
| 21 | Bias                 | <a href="#">#9</a> Describe any efforts to address potential sources of bias                   | 7-8 |
| 22 |                      |                                                                                                |     |
| 23 | Study size           | <a href="#">#10</a> Explain how the study size was arrived at                                  | n/a |
| 24 |                      |                                                                                                |     |
| 25 | Quantitative         | <a href="#">#11</a> Explain how quantitative variables were handled in the analyses. If        | 7-8 |
| 26 | variables            | applicable, describe which groupings were chosen, and why                                      |     |
| 27 |                      |                                                                                                |     |
| 28 |                      |                                                                                                |     |
| 29 | Statistical          | <a href="#">#12a</a> Describe all statistical methods, including those used to control for     | 7-8 |
| 30 | methods              | confounding                                                                                    |     |
| 31 |                      |                                                                                                |     |
| 32 |                      |                                                                                                |     |
| 33 | Statistical          | <a href="#">#12b</a> Describe any methods used to examine subgroups and interactions           | 7-8 |
| 34 | methods              |                                                                                                |     |
| 35 |                      |                                                                                                |     |
| 36 |                      |                                                                                                |     |
| 37 | Statistical          | <a href="#">#12c</a> Explain how missing data were addressed                                   | n/a |
| 38 | methods              |                                                                                                |     |
| 39 |                      |                                                                                                |     |
| 40 |                      |                                                                                                |     |
| 41 | Statistical          | <a href="#">#12d</a> If applicable, explain how loss to follow-up was addressed                | n/a |
| 42 | methods              |                                                                                                |     |
| 43 |                      |                                                                                                |     |
| 44 |                      |                                                                                                |     |
| 45 | Statistical          | <a href="#">#12e</a> Describe any sensitivity analyses                                         | n/a |
| 46 | methods              |                                                                                                |     |
| 47 |                      |                                                                                                |     |
| 48 | <b>Results</b>       |                                                                                                |     |
| 49 |                      |                                                                                                |     |
| 50 |                      |                                                                                                |     |
| 51 | Participants         | <a href="#">#13a</a> Report numbers of individuals at each stage of study—eg numbers           | 8   |
| 52 |                      | potentially eligible, examined for eligibility, confirmed eligible,                            |     |
| 53 |                      | included in the study, completing follow-up, and analysed. Give                                |     |
| 54 |                      | information separately for for exposed and unexposed groups if                                 |     |
| 55 |                      | applicable.                                                                                    |     |
| 56 |                      |                                                                                                |     |
| 57 |                      |                                                                                                |     |
| 58 |                      |                                                                                                |     |
| 59 |                      |                                                                                                |     |
| 60 |                      |                                                                                                |     |

|    |                    |                      |                                                                            |       |
|----|--------------------|----------------------|----------------------------------------------------------------------------|-------|
| 1  | Participants       | <a href="#">#13b</a> | Give reasons for non-participation at each stage                           | n/a   |
| 2  |                    |                      |                                                                            |       |
| 3  | Participants       | <a href="#">#13c</a> | Consider use of a flow diagram                                             | n/a   |
| 4  |                    |                      |                                                                            |       |
| 5  | Descriptive data   | <a href="#">#14a</a> | Give characteristics of study participants (eg demographic, clinical,      | 8     |
| 6  |                    |                      | social) and information on exposures and potential confounders. Give       |       |
| 7  |                    |                      | information separately for exposed and unexposed groups if applicable.     |       |
| 8  |                    |                      |                                                                            |       |
| 9  |                    |                      |                                                                            |       |
| 10 |                    |                      |                                                                            |       |
| 11 | Descriptive data   | <a href="#">#14b</a> | Indicate number of participants with missing data for each variable of     | n/a   |
| 12 |                    |                      | interest                                                                   |       |
| 13 |                    |                      |                                                                            |       |
| 14 |                    |                      |                                                                            |       |
| 15 | Descriptive data   | <a href="#">#14c</a> | Summarise follow-up time (eg, average and total amount)                    | 8     |
| 16 |                    |                      |                                                                            |       |
| 17 | Outcome data       | <a href="#">#15</a>  | Report numbers of outcome events or summary measures over time.            | 9-11  |
| 18 |                    |                      | Give information separately for exposed and unexposed groups if            |       |
| 19 |                    |                      | applicable.                                                                |       |
| 20 |                    |                      |                                                                            |       |
| 21 |                    |                      |                                                                            |       |
| 22 | Main results       | <a href="#">#16a</a> | Give unadjusted estimates and, if applicable, confounder-adjusted          | 9-11  |
| 23 |                    |                      | estimates and their precision (eg, 95% confidence interval). Make clear    |       |
| 24 |                    |                      | which confounders were adjusted for and why they were included             |       |
| 25 |                    |                      |                                                                            |       |
| 26 |                    |                      |                                                                            |       |
| 27 |                    |                      |                                                                            |       |
| 28 | Main results       | <a href="#">#16b</a> | Report category boundaries when continuous variables were categorized      | 9-11  |
| 29 |                    |                      |                                                                            |       |
| 30 | Main results       | <a href="#">#16c</a> | If relevant, consider translating estimates of relative risk into absolute | n/a   |
| 31 |                    |                      | risk for a meaningful time period                                          |       |
| 32 |                    |                      |                                                                            |       |
| 33 |                    |                      |                                                                            |       |
| 34 | Other analyses     | <a href="#">#17</a>  | Report other analyses done—e.g., analyses of subgroups and                 | 10-11 |
| 35 |                    |                      | interactions, and sensitivity analyses                                     |       |
| 36 |                    |                      |                                                                            |       |
| 37 |                    |                      |                                                                            |       |
| 38 | <b>Discussion</b>  |                      |                                                                            |       |
| 39 |                    |                      |                                                                            |       |
| 40 | Key results        | <a href="#">#18</a>  | Summarise key results with reference to study objectives                   | 12    |
| 41 |                    |                      |                                                                            |       |
| 42 | Limitations        | <a href="#">#19</a>  | Discuss limitations of the study, taking into account sources of potential | 16    |
| 43 |                    |                      | bias or imprecision. Discuss both direction and magnitude of any           |       |
| 44 |                    |                      | potential bias.                                                            |       |
| 45 |                    |                      |                                                                            |       |
| 46 |                    |                      |                                                                            |       |
| 47 |                    |                      |                                                                            |       |
| 48 | Interpretation     | <a href="#">#20</a>  | Give a cautious overall interpretation considering objectives,             | 12-17 |
| 49 |                    |                      | limitations, multiplicity of analyses, results from similar studies, and   |       |
| 50 |                    |                      | other relevant evidence.                                                   |       |
| 51 |                    |                      |                                                                            |       |
| 52 |                    |                      |                                                                            |       |
| 53 | Generalisability   | <a href="#">#21</a>  | Discuss the generalisability (external validity) of the study results      | 12-17 |
| 54 |                    |                      |                                                                            |       |
| 55 | <b>Other</b>       |                      |                                                                            |       |
| 56 |                    |                      |                                                                            |       |
| 57 | <b>Information</b> |                      |                                                                            |       |
| 58 |                    |                      |                                                                            |       |
| 59 |                    |                      |                                                                            |       |
| 60 |                    |                      |                                                                            |       |

1 Funding [#22](#) Give the source of funding and the role of the funders for the present 19  
2 study and, if applicable, for the original study on which the present  
3 article is based  
4  
5

6 None The STROBE checklist is distributed under the terms of the Creative Commons Attribution License CC-  
7 BY. This checklist can be completed online using <https://www.goodreports.org/>, a tool made by the [EQUATOR](#)  
8 [Network](#) in collaboration with [Penelope.ai](#)  
9  
10  
11  
12  
13  
14  
15  
16  
17  
18  
19  
20  
21  
22  
23  
24  
25  
26  
27  
28  
29  
30  
31  
32  
33  
34  
35  
36  
37  
38  
39  
40  
41  
42  
43  
44  
45  
46  
47  
48  
49  
50  
51  
52  
53  
54  
55  
56  
57  
58  
59  
60
