# Supplementary material for: HbA1c variability in adults with type 1 diabetes on continuous subcutaneous insulin infusion (CSII) therapy compared to multiple daily injection (MDI) treatment
Source: PubMed Central journal article supplement — BMJ Open. 2019 Dec 29;9(12):e033059. doi: 10.1136/bmjopen-2019-033059 (PMC6937034; doi:10.1136/bmjopen-2019-033059), 2019-12-29
Supplement: bmjopen-2019-033059supp001.pdf [file bmjopen-2019-033059supp001.pdf]

**Supplementary Table 1.** Clinical characteristics of adults with Type 1 diabetes by location.

| Location                        | Royal North Shore Hospital | St Vincent's Hospital | P value           |
|---------------------------------|----------------------------|-----------------------|-------------------|
| N                               | 394                        | 112                   |                   |
| CSII (n (%))                    | 98 (24.9)                  | 66 (58.9)             | <b>&lt; 0.001</b> |
| Age (years)                     | 38±16                      | 36±12                 | 0.23              |
| Women (n (%))                   | 189 (62)                   | 65 (58)               | <b>0.049</b>      |
| Years of diabetes               | 17±14                      | 18±13                 | 0.47              |
| Years CSII therapy              | 5±4                        | 7±3                   | <b>0.026</b>      |
| Vascular complications (n (%))* | 161 (41)                   | 31 (30)               | <b>0.04</b>       |
| Severe hypoglycaemia (n (%))†   | 84 (22)                    | -                     | -                 |
| Socioeconomic status (decile):  |                            |                       |                   |
| Advantage / Disadvantage        |                            |                       |                   |
| Education & occupation          | 9±2                        | 7±2                   | <b>&lt; 0.001</b> |
|                                 | 9±2                        | 7±3                   | <b>&lt; 0.001</b> |
| Years follow-up                 | 3.0±1.9                    | 7.0±5.9               | <b>&lt; 0.001</b> |
| HbA1c measures (n)              | 7±4                        | 15±13                 | <b>&lt; 0.001</b> |
| Time between HbA1c (days)       | 238±197                    | 237±185               | 0.98              |
| Mean HbA1c                      |                            |                       |                   |
| %                               | 8.0±1.5                    | 7.7±1.5               | 0.06              |
| [mmol/mol]                      | [64±16]                    | [60±12]               |                   |

Data are mean ± standard deviation, or n (percentage). \* Microvascular and macrovascular complications. † Any episode of severe hypoglycaemia recorded in the medical record.

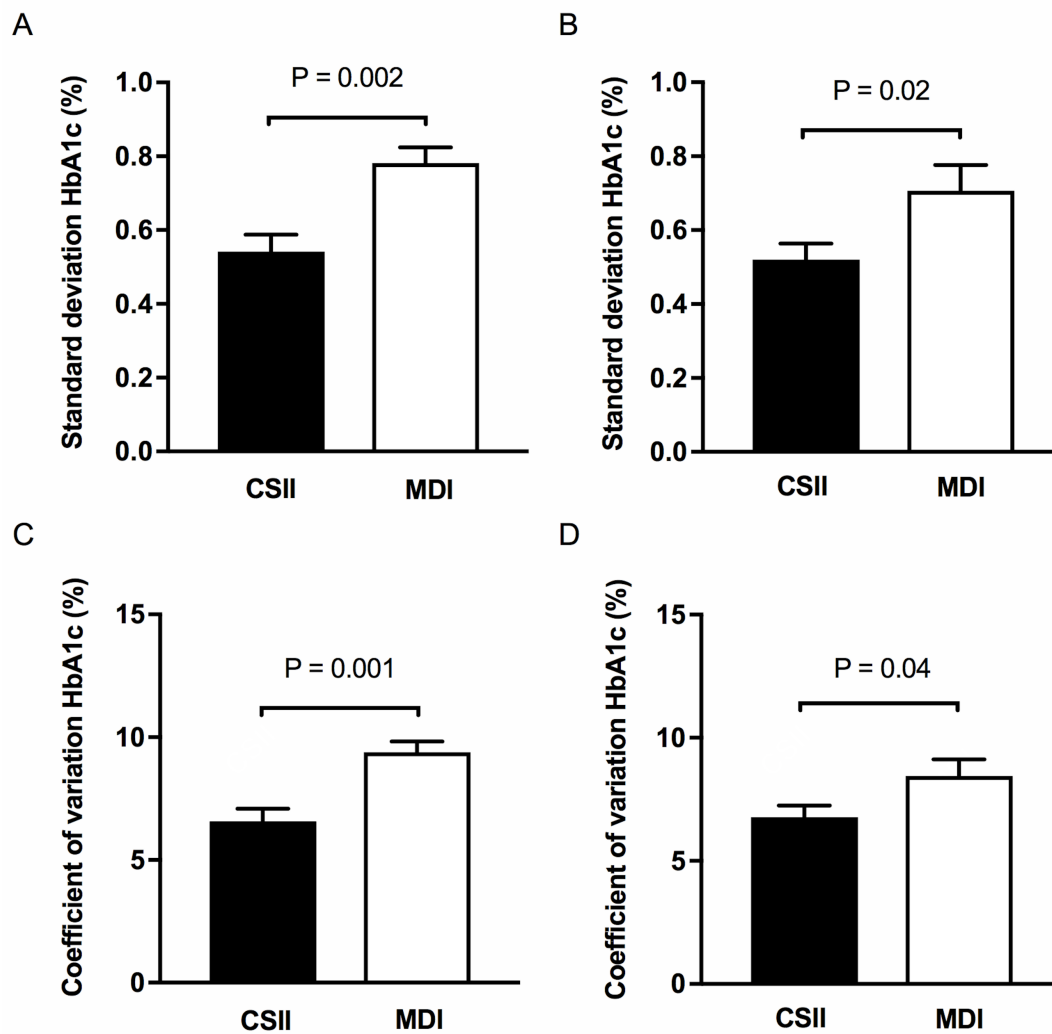

**Supplementary Figure 1.** Long-term glycaemic variability in CSII and MDI participants by hospital location. Standard deviation of HbA1c over follow-up ( $0.5 \pm 0.5$  % [ $6 \pm 7$ ] mmol/mol) CSII, ( $0.8 \pm 0.7$  % [ $9 \pm 8$ ] mmol/mol) MDI, Royal North Shore Hospital (A) and standard deviation of HbA1c ( $0.5 \pm 0.4$  % [ $6 \pm 4$ ] mmol/mol) CSII,

( $0.7 \pm 0.5$  % [ $11 \pm 9$ ] mmol/mol) MDI, St Vincent's Hospital (B). Coefficient of variation of HbA1c over follow-up ( $6.6 \pm 5.1$  % [ $10 \pm 12$ ] mmol/mol) CSII, ( $9.4 \pm 7.7$  % [ $13 \pm 11$ ] mmol/mol) MDI, Royal North Shore Hospital (C) and coefficient of variation of HbA1c ( $6.8 \pm 3.8$  % [ $9 \pm 5$ ] mmol/mol) CSII and ( $8.4 \pm 4.6$  % [ $21 \pm 20$ ] mmol/mol) MDI, St Vincent's Hospital (D). Black bars = CSII; white bars = MDI. Graphed values are Mean +/- SEM.

**Supplementary Table 2.** Clinical characteristics of adults with Type 1 diabetes by age subgroups of 18-26 years and greater than or equal to 26 years.

|                                 | 18-26 y |         |             | ≥ 26 y  |          |                  |
|---------------------------------|---------|---------|-------------|---------|----------|------------------|
|                                 | CSII    | MDI     | P value     | CSII    | MDI      | P value          |
| N                               | 54      | 69      |             | 110     | 273      |                  |
| Age (years)                     | 20±2    | 20±2    | 0.57        | 40±11   | 44±14    | <b>0.009</b>     |
| Women (n (%))                   | 34 (63) | 30 (43) | <b>0.03</b> | 72 (65) | 118 (43) | <b>&lt;0.001</b> |
| Years of diabetes               | 9±5     | 8±6     | 0.48        | 21±13   | 20±15    | 0.56             |
| Years CSII therapy              | 6±3     | N/A     | -           | 6±4     | N/A      | -                |
| Vascular complications (n (%))* | 5 (9)   | 10 (15) | 0.35        | 44 (41) | 122 (50) | 0.12             |
| Severe hypoglycaemia (n (%))†   | 4 (10)  | 5 (10)  | 0.96        | 10 (18) | 65 (27)  | 0.17             |
| Socioeconomic status (decile):  |         |         |             |         |          |                  |
| Advantage/Disadvantage          | 9±2     | 9±2     | 0.12        | 8±3     | 9±2      | <b>&lt;0.001</b> |
| Education & occupation          | 9±2     | 9±2     | 0.41        | 8±3     | 9±2      | <b>&lt;0.001</b> |
| Study follow-up (years)         | 3±2.6   | 3.6±4.0 | 0.50        | 4.5±2.7 | 4.2±4.0  | 0.52             |
| HbA1c measurements (n)          | 7±6     | 9±10    | 0.40        | 9±8     | 8±8      | 0.43             |
| Time between HbA1c (days)       | 221±237 | 205±127 | 0.62        | 20±131  | 261±216  | <b>0.019</b>     |
| Mean HbA1c %                    | 8.3±1.3 | 8.5±1.6 | 0.52        | 7.6±1.1 | 7.9±1.4  | <b>0.034</b>     |
| [mmol/mol]                      | [66±14] | [68±18] |             | [59±12] | [62±16]  |                  |

Data are mean ± standard deviation, or n (percentage). \* Microvascular and/or macrovascular complications. † Any episode of severe hypoglycaemia recorded in the medical record.

**Supplementary Table 3.** Long-term glycaemic variability in individuals changing from MDI to CSII therapy by gender.

| Gender                        | Male (n = 15)     |                   |              | Female (n= 41)     |                    |                  |
|-------------------------------|-------------------|-------------------|--------------|--------------------|--------------------|------------------|
|                               | MDI (pre)         | CSII (post)       | P value      | MDI (pre)          | CSII (post)        | P value          |
| Mean HbA1c<br>%<br>[mmol/mol] | 7.8±0.7<br>[62±8] | 7.4±0.8<br>[57±8] | <b>0.014</b> | 7.9±0.8<br>[62±9]  | 7.3±1.0<br>[57±10] | <b>0.001</b>     |
| SD HbA1c<br>%<br>[mmol/mol]   | 0.6±0.4<br>[7±4]  | 0.4±0.2<br>[4±2]  | <b>0.007</b> | 0.8±0.5<br>[8±5]   | 0.5±0.4<br>[5±4]   | <b>&lt;0.001</b> |
| CV HbA1c<br>%<br>[mmol/mol]   | 7.9±4.5<br>[11±6] | 5.1±3.2<br>[7±5]  | <b>0.013</b> | 9.7±5.8<br>[14±8 ] | 6.4±4.1<br>[9±6]   | <b>0.001</b>     |
